# Supplementary material
Source: PubMed Central journal article supplement (PMC4004382)
Supplement: NIHMS532473-supplement-10858_2013_9788_MOESM1_ESM.pdf [file NIHMS532473-supplement-10858_2013_9788_MOESM1_ESM.pdf]

## Supplementary Information

### Resonance Assignment of the NMR Spectra of Disordered Proteins Using a Multi-Objective Non-Dominated Sorting Genetic Algorithm

Yu Yang, Keith J. Fritzsche, and Mei Hong\*

Department of Chemistry, Iowa State University, Ames, Iowa 50011

#### Mutation and crossover operators in the modified NSGA-II and combination NSGA-II/MC algorithms

The assignment result in our program is stored in an  $N_{\text{res}} \times M$  matrix, where  $N_{\text{res}}$  is the number of residues in the sequence and  $M$  is the number of spectra. Name the matrix as  $\mathbf{p}$ , and  $\mathbf{p}(i, j)$  is the number of the peak in the  $j^{\text{th}}$  spectrum that is assigned to the  $i^{\text{th}}$  residue in the sequence. If  $\mathbf{p}(i, j) = 0$ , then it means the  $i^{\text{th}}$  residue contributes to none of the cross peaks in the  $j^{\text{th}}$  spectrum.

The crossover operator, which is also called “recombination”, uses two parents to generate two children. For convenience, the two parents are represented by  $\mathbf{p}_1(i, j)$  and  $\mathbf{p}_2(i, j)$ , where  $i = 1, 2, \dots, N_{\text{res}}$ ;  $j = 1, 2, \dots, M$ . Randomly choose the  $k^{\text{th}}$  residue in the sequence, and the  $q^{\text{th}}$  spectrum, exchange the assignments of the two parents, i.e.  $\mathbf{p}_1(k, q)$  and  $\mathbf{p}_2(k, q)$  but keep other residues’ assignment the same, then two new children  $\mathbf{c}_1$  and  $\mathbf{c}_2$  are obtained. In doing so care must be taken that the maximum degeneracies of the newly assigned peaks are not exceeded.

The mutation operator uses one parent to generate one child. In our program, three mutation operators are designed. The first one is called simple mutation: randomly choose a spectrum index  $q$  and a residue  $k$ ; change the assigned peak number  $\mathbf{p}(k, q)$  to another peak or 0. The second operator is called exchange mutation: randomly choose a spectrum index  $q$ , and two residues  $k_1$  and  $k_2$  ( $k_1 \neq k_2$ ); exchange the two assignments  $\mathbf{p}(k_1, q)$  and  $\mathbf{p}(k_2, q)$ . The third operator is called multi-exchange mutation: randomly choose two residues  $k_1$  and  $k_2$ ; exchange the assignments of the  $k_1^{\text{th}}$  residue and the  $k_2^{\text{th}}$  residue in each spectrum. While changing the assignment of a residue, all normal constraints must be satisfied. This means that the possible residue types of the assigned peak given in the peak list should include the residue that the peak is assigned to, and the maximum degeneracy of the assigned peak must not be exceeded. These three mutation operators are used for making multiple changes to the previous solution in a single step. Proper design of the operator can prevent the algorithm from being trapped in a local optimum. The users can also design their own operators to make the algorithm work more effectively.

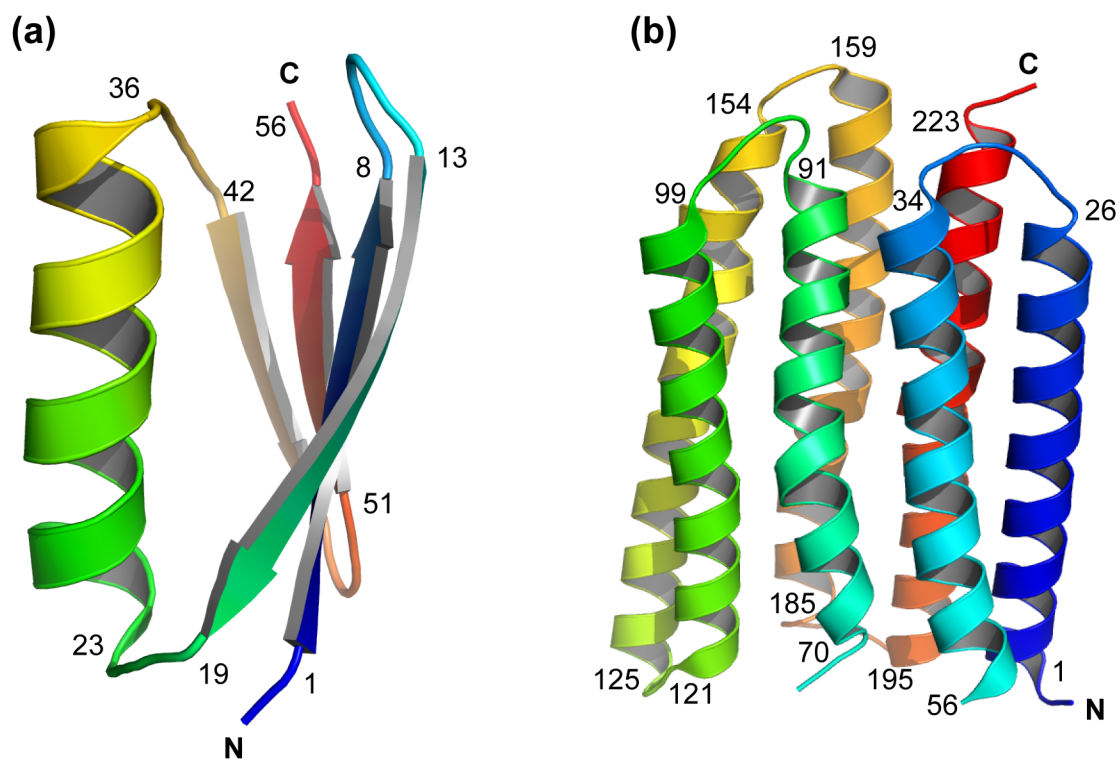

**Figure S1.** Cartoon representations of (a) GB1 (PDB: 2QMT) and (b) sensory rhodopsin (PDB: 1XIO). Key residue numbers are indicated to denote the positions of the deleted residues in the input peak lists.

**Table S1.** GB1 peak lists with 20% consecutive deletion.

NCACX

| 45    | 5    |       |      |       |     |     |     |     |     |   |                         |
|-------|------|-------|------|-------|-----|-----|-----|-----|-----|---|-------------------------|
| 39.5  | 54.6 | 171.7 | 32.8 | 30.6  | 0.5 | 0.3 | 0.3 | 0.3 | 0.3 | 1 | K(C)M(C)                |
| 104.5 | 60.7 | 175.8 | 70.3 |       | 0.3 | 0.4 | 0.4 | 0.4 | 0.4 | 1 | T(CH)                   |
| 105.9 | 45.2 | 171.7 |      |       | 0.3 | 0.3 | 0.3 | 0.3 | 0.3 | 1 | G(CSH)                  |
| 109   | 60.7 | 174.5 | 72.9 |       | 0.2 | 0.2 | 0.2 | 0.2 | 0.2 | 1 | T(CS)                   |
| 112.4 | 62.9 | 174.8 | 72.1 |       | 0.4 | 0.4 | 0.4 | 0.4 | 0.4 | 1 | T(CSH)                  |
| 112.5 | 60.7 | 172.6 | 72.2 | 21.4  | 0.3 | 0.3 | 0.3 | 0.3 | 0.3 | 1 | T(SC)                   |
| 115.2 | 53.7 | 174.5 | 40.6 | 177.1 | 0.2 | 0.2 | 0.2 | 0.2 | 0.2 | 1 | D(C)N(C)                |
| 115.6 | 60.5 | 172.4 | 70.9 |       | 0.4 | 0.4 | 0.4 | 0.4 | 0.4 | 1 | T(SC)                   |
| 116.4 | 60.7 | 174.7 | 73   |       | 0.3 | 0.4 | 0.4 | 0.4 | 0.4 | 1 | T(SC)                   |
| 116.6 | 61.6 | 171.6 | 71.1 |       | 0.3 | 0.3 | 0.3 | 0.3 | 0.3 | 1 | T(SC)                   |
| 116.6 | 59.4 | 178.1 | 29.4 | 35.8  | 0.2 | 0.3 | 0.3 | 0.3 | 0.3 | 1 | E(HC)Q(H)R(H)           |
| 117.6 | 67.4 | 176.1 | 68   |       | 0.2 | 0.2 | 0.2 | 0.2 | 0.2 | 1 | T(HC)                   |
| 117   | 59.8 | 178.8 | 32.4 | 26.2  | 0.4 | 0.4 | 0.4 | 0.4 | 0.4 | 1 | K(H)Q(H)R(H)E(H)M(H)    |
| 117.9 | 56.6 | 179.2 | 38.9 | 175.7 | 0.3 | 0.4 | 0.4 | 0.4 | 0.4 | 1 | N(HC)D(H)               |
| 118.1 | 58.2 | 172.3 | 32.4 | 21.6  | 0.3 | 0.3 | 0.3 | 0.3 | 0.3 | 1 | V(SC)K(C)               |
| 118.3 | 57.5 | 171.6 | 42.5 | 127.5 | 0.3 | 0.3 | 0.3 | 0.3 | 0.3 | 1 | F(S)Y(S)                |
| 118.5 | 57.2 | 178.8 | 37.2 | 138.1 | 0.2 | 0.3 | 0.3 | 0.3 | 0.3 | 1 | F(H)Y(CH)H(HC)          |
| 118.8 | 54.9 | 177.7 | 31.3 | 35.5  | 0.2 | 0.2 | 0.2 | 0.2 | 0.2 | 1 | E(CS)K(CHS)R(C)M(C)Q(C) |
| 118.8 | 53.8 | 179.5 | 18.8 |       | 0.2 | 0.2 | 0.2 | 0.2 | 0.2 | 1 | A(HC)L(H)               |
| 119.6 | 66.7 | 179.4 | 32.4 | 22.6  | 0.3 | 0.4 | 0.4 | 0.4 | 0.4 | 1 | V(HC)                   |
| 120   | 55.9 | 175.8 | 28.3 | 24.7  | 0.3 | 0.3 | 0.3 | 0.3 | 0.3 | 1 | K(C)R(C)Q(C)            |
| 121.3 | 55   | 182   | 18.7 |       | 0.5 | 0.5 | 0.5 | 0.5 | 0.5 | 1 | A(HC)                   |
| 121.3 | 60.5 | 179.7 | 32   | 27.7  | 0.5 | 0.4 | 0.4 | 0.4 | 0.4 | 1 | K(H)E(H)R(H)Q(H)        |
| 121.4 | 62   | 179.2 | 37.4 | 130.2 | 0.4 | 0.4 | 0.4 | 0.4 | 0.4 | 1 | Y(H)F(H)                |
| 121.4 | 54.2 | 174.4 | 34.5 | 35.4  | 0.3 | 0.3 | 0.3 | 0.3 | 0.3 | 1 | K(SC)E(S)R(S)M(S)       |
| 121.4 | 56.2 | 176.5 | 38.6 | 178.1 | 0.3 | 0.3 | 0.3 | 0.3 | 0.3 | 1 | N(H)D(CH)               |
| 121.6 | 59.2 | 177.9 | 29.3 | 34.5  | 0.3 | 0.3 | 0.3 | 0.3 | 0.3 | 1 | E(HC)Q(H)R(H)K(HC)      |
| 122.9 | 55.1 | 173.5 | 36.5 | 25.9  | 0.2 | 0.2 | 0.2 | 0.2 | 0.2 | 1 | K(SC)R(S)E(S)           |
| 122.3 | 56.6 | 179.2 | 17.7 |       | 0.4 | 0.4 | 0.4 | 0.4 | 0.4 | 1 | A(H)                    |
| 122.4 | 54.2 | 179.3 | 17.8 |       | 0.4 | 0.4 | 0.4 | 0.4 | 0.4 | 1 | A(HC)                   |
| 123   | 52.9 | 175.4 | 38.4 | 25.7  | 0.3 | 0.3 | 0.3 | 0.3 | 0.3 | 1 | N(CH)L(CS)D(C)K(SC)     |
| 123   | 56.7 | 174.7 | 43.4 | 128.2 | 0.3 | 0.3 | 0.3 | 0.3 | 0.3 | 1 | Y(S)F(SC)               |
| 123.1 | 54.3 | 177.2 | 42.7 | 179.5 | 0.3 | 0.3 | 0.3 | 0.3 | 0.3 | 1 | D(CSH)                  |
| 123.8 | 54.7 | 177   | 17.3 |       | 0.2 | 0.2 | 0.2 | 0.2 | 0.2 | 1 | A(HC)                   |
| 123.9 | 61.1 | 174   | 71.9 |       | 0.2 | 0.2 | 0.2 | 0.2 | 0.2 | 1 | T(SC)                   |
| 125.5 | 58   | 177.9 | 34.3 | 112.3 | 0.5 | 0.5 | 0.5 | 0.5 | 0.5 | 1 | W(CSH)                  |
| 125.5 | 51.1 | 176.8 | 38.8 | 177   | 0.4 | 0.4 | 0.4 | 0.4 | 0.4 | 1 | D(C)N(CS)               |
| 125.5 | 56.2 | 175.4 | 30.6 | 35.3  | 0.3 | 0.3 | 0.3 | 0.3 | 0.3 | 1 | E(CS)K(CS)R(CS)Q(C)     |
| 125.6 | 54.5 | 176.1 | 30.8 | 36    | 0.2 | 0.2 | 0.2 | 0.2 | 0.2 | 1 | E(CS)K(CS)R(S)          |
| 126.5 | 60.1 | 175.4 | 38   | 27.6  | 0.2 | 0.1 | 0.1 | 0.1 | 0.1 | 1 | I(SC)E(H)               |
| 125.9 | 50.5 | 175.9 | 42.2 | 179.8 | 0.4 | 0.4 | 0.4 | 0.4 | 0.4 | 1 | D(CS)N(C)               |
| 126.7 | 52.7 | 174.5 | 42.2 | 27.1  | 0.3 | 0.3 | 0.3 | 0.3 | 0.3 | 1 | L(SC)                   |
| 126.9 | 54.5 | 174.9 | 42.7 | 27    | 0.2 | 0.2 | 0.2 | 0.2 | 0.2 | 1 | L(SC)                   |
| 130.7 | 56.9 | 176.1 | 43.4 | 140.3 | 0.4 | 0.3 | 0.3 | 0.3 | 0.3 | 1 | F(SC)Y(S)               |
| 131.3 | 57.8 | 180.5 | 33.3 | 38.8  | 0.2 | 0.2 | 0.2 | 0.2 | 0.2 | 1 | L(H)E(C)Q(H)            |

NCOCX

| 44    | 5    |       |      |      |     |     |     |     |     |   |                    |
|-------|------|-------|------|------|-----|-----|-----|-----|-----|---|--------------------|
| 104.2 | 54   | 179.7 | 19   |      | 0.3 | 0.4 | 0.4 | 0.4 | 0.4 | 1 | A(HC)              |
| 105.6 | 53.3 | 175.8 | 38.8 | 26.1 | 0.3 | 0.3 | 0.3 | 0.3 | 0.3 | 1 | N(C)L(CS)R(C)K(SC) |

|       |      |       |      |       |     |     |     |     |     |   |                    |
|-------|------|-------|------|-------|-----|-----|-----|-----|-----|---|--------------------|
| 108.4 | 53.5 | 174.3 | 40.4 | 176.9 | 0.3 | 0.3 | 0.3 | 0.3 | 0.3 | 1 | D(C)N(C)           |
| 109.2 | 57.5 | 177.4 | 33.8 | 111.8 | 0.2 | 0.2 | 0.2 | 0.2 | 0.2 | 1 | W(S)               |
| 109.6 | 50.7 | 176.4 | 38.4 | 176.6 | 0.2 | 0.2 | 0.2 | 0.2 | 0.2 | 1 | N(CSH)D(C)         |
| 112   | 55.6 | 175.5 | 28   | 24.4  | 0.4 | 0.4 | 0.4 | 0.4 | 0.4 | 1 | K(CS)R(C)L(HS)     |
| 112.2 | 56.6 | 175.8 | 43.1 | 140   | 0.3 | 0.3 | 0.3 | 0.3 | 0.3 | 1 | F(SC)Y(S)          |
| 115   | 55.9 | 176.2 | 38.3 | 177.8 | 0.2 | 0.2 | 0.2 | 0.2 | 0.2 | 1 | N(HC)D(HC)         |
| 115.2 | 53.9 | 174.1 | 34.2 | 35.1  | 0.4 | 0.4 | 0.4 | 0.4 | 0.4 | 1 | E(SC)Q(S)K(C)M(SC) |
| 116.1 | 60.1 | 172   | 70.5 |       | 0.3 | 0.4 | 0.4 | 0.4 | 0.4 | 1 | T(SC)              |
| 116.3 | 60.3 | 174.3 | 72.6 |       | 0.3 | 0.3 | 0.3 | 0.3 | 0.3 | 1 | T(SC)              |
| 116.4 | 55   | 177.3 | 17.6 |       | 0.2 | 0.3 | 0.3 | 0.3 | 0.3 | 1 | A(HC)              |
| 117.4 | 54.5 | 181.5 | 18.2 |       | 0.2 | 0.2 | 0.2 | 0.2 | 0.2 | 1 | A(HC)              |
| 117.4 | 59.1 | 177.8 | 29.1 | 35.5  | 0.4 | 0.4 | 0.4 | 0.4 | 0.4 | 1 | E(HC)Q(H)R(H)      |
| 118.2 | 56.1 | 179.6 | 18.1 |       | 0.3 | 0.4 | 0.4 | 0.4 | 0.4 | 1 | A(HC)              |
| 118.4 | 60.4 | 172.3 | 71.9 | 21.1  | 0.3 | 0.3 | 0.3 | 0.3 | 0.3 | 1 | T(SC)              |
| 118.6 | 60.9 | 174.7 | 73.1 |       | 0.3 | 0.3 | 0.3 | 0.3 | 0.3 | 1 | T(CS)              |
| 118.7 | 66.3 | 179   | 32   | 22.2  | 0.2 | 0.3 | 0.3 | 0.3 | 0.3 | 1 | V(H)               |
| 119   | 54.6 | 177.5 | 43   | 179.8 | 0.2 | 0.2 | 0.2 | 0.2 | 0.2 | 1 | D(CH)N(H)          |
| 119.3 | 60.2 | 179.2 | 32.8 | 26.5  | 0.3 | 0.4 | 0.4 | 0.4 | 0.4 | 1 | K(HC)E(H)          |
| 119.7 | 60.3 | 175.4 | 69.9 |       | 0.3 | 0.3 | 0.3 | 0.3 | 0.3 | 1 | T(CSH)             |
| 120.8 | 54.6 | 179.7 | 18.2 |       | 0.5 | 0.5 | 0.5 | 0.5 | 0.5 | 1 | A(HC)              |
| 120.8 | 57.5 | 179.1 | 37.5 | 138.4 | 0.5 | 0.4 | 0.4 | 0.4 | 0.4 | 1 | F(HC)Y(HC)         |
| 121   | 58.9 | 177.6 | 29   | 34.2  | 0.4 | 0.4 | 0.4 | 0.4 | 0.4 | 1 | Q(HC)E(HC)         |
| 121.1 | 44.9 | 171.4 |      |       | 0.3 | 0.3 | 0.3 | 0.3 | 0.3 | 1 | G(CS)              |
| 121.1 | 57   | 179.6 | 39.3 | 176.1 | 0.3 | 0.3 | 0.3 | 0.3 | 0.3 | 1 | D(HC)N(H)          |
| 121.3 | 60.1 | 179.3 | 31.6 | 27.3  | 0.3 | 0.3 | 0.3 | 0.3 | 0.3 | 1 | K(H)R(H)           |
| 122.7 | 57   | 175   | 43.7 | 128.5 | 0.2 | 0.2 | 0.2 | 0.2 | 0.2 | 1 | F(SC)Y(S)          |
| 122.7 | 61.6 | 178.8 | 37   | 129.8 | 0.4 | 0.4 | 0.4 | 0.4 | 0.4 | 1 | F(H)Y(HC)          |
| 123.3 | 55.9 | 175.1 | 30.3 | 35    | 0.3 | 0.3 | 0.3 | 0.3 | 0.3 | 1 | E(CS)K(CS)Q(CSH)   |
| 123.4 | 50.9 | 176.3 | 42.6 | 180.2 | 0.3 | 0.3 | 0.3 | 0.3 | 0.3 | 1 | D(CS)N(C)          |
| 124   | 67.2 | 175.9 | 67.8 |       | 0.2 | 0.2 | 0.2 | 0.2 | 0.2 | 1 | T(HC)              |
| 124.1 | 58.5 | 172.6 | 32.7 | 21.9  | 0.2 | 0.2 | 0.2 | 0.2 | 0.2 | 1 | V(SC)K(HC)         |
| 125   | 55.1 | 177.9 | 31.5 | 35.7  | 0.5 | 0.5 | 0.5 | 0.5 | 0.5 | 1 | E(SCH)M(C)R(S)Q(C) |
| 125.1 | 54.7 | 175.1 | 42.9 | 27.2  | 0.4 | 0.4 | 0.4 | 0.4 | 0.4 | 1 | L(CSH)             |
| 125.2 | 54.3 | 171.4 | 32.5 | 30.3  | 0.3 | 0.3 | 0.3 | 0.3 | 0.3 | 1 | K(CH)M(CH)         |
| 125.4 | 61.3 | 171.3 | 70.8 |       | 0.2 | 0.2 | 0.2 | 0.2 | 0.2 | 1 | T(SC)              |
| 125.9 | 54.3 | 175.9 | 30.6 | 35.8  | 0.2 | 0.2 | 0.2 | 0.2 | 0.2 | 1 | E(CS)              |
| 126.3 | 53   | 174.8 | 42.5 | 27.4  | 0.2 | 0.1 | 0.1 | 0.1 | 0.1 | 1 | L(SC)              |
| 126.3 | 57.8 | 171.9 | 42.7 | 127.8 | 0.4 | 0.4 | 0.4 | 0.4 | 0.4 | 1 | F(S)Y(S)           |
| 127   | 54.9 | 173.3 | 36.3 | 25.7  | 0.3 | 0.3 | 0.3 | 0.3 | 0.3 | 1 | K(SC)              |
| 127.1 | 60   | 175.3 | 37.9 | 27.5  | 0.2 | 0.2 | 0.2 | 0.2 | 0.2 | 1 | I(SCH)R(H)         |
| 130.3 | 62.5 | 174.4 | 71.7 |       | 0.4 | 0.3 | 0.3 | 0.3 | 0.3 | 1 | T(SCH)             |
| 131.1 | 61.3 | 174.2 | 72.1 |       | 0.2 | 0.2 | 0.2 | 0.2 | 0.2 | 1 | T(SC)              |

**Table S2.** GB1 peak lists with random deletion of 20% of the residues.

NCACX

| 44    | 5    |       |      |       |     |     |     |     |     |   |                         |
|-------|------|-------|------|-------|-----|-----|-----|-----|-----|---|-------------------------|
| 104.5 | 60.7 | 175.8 | 70.3 |       | 0.3 | 0.4 | 0.4 | 0.4 | 0.4 | 1 | T(CH)                   |
| 105.9 | 45.2 | 171.7 |      |       | 0.3 | 0.3 | 0.3 | 0.3 | 0.3 | 1 | G(CSH)                  |
| 106.6 | 62.1 | 173.6 | 69.7 |       | 0.2 | 0.2 | 0.2 | 0.2 | 0.2 | 1 | T(CSH)                  |
| 108.3 | 45.3 | 173   |      |       | 0.2 | 0.2 | 0.2 | 0.2 | 0.2 | 1 | G(CS)                   |
| 108.1 | 46.5 | 173.7 |      |       | 0.3 | 0.3 | 0.3 | 0.3 | 0.3 | 1 | G(CHS)                  |
| 109   | 60.7 | 174.5 | 72.9 |       | 0.2 | 0.2 | 0.2 | 0.2 | 0.2 | 1 | T(CS)                   |
| 109.4 | 44.5 | 173   |      |       | 0.2 | 0.2 | 0.2 | 0.2 | 0.2 | 1 | G(CS)                   |
| 112.4 | 62.9 | 174.8 | 72.1 |       | 0.4 | 0.4 | 0.4 | 0.4 | 0.4 | 1 | T(CSH)                  |
| 112.5 | 60.7 | 172.6 | 72.2 | 21.4  | 0.3 | 0.3 | 0.3 | 0.3 | 0.3 | 1 | T(SC)                   |
| 115.2 | 53.7 | 174.5 | 40.6 | 177.1 | 0.2 | 0.2 | 0.2 | 0.2 | 0.2 | 1 | D(C)N(C)                |
| 115.6 | 60.5 | 172.4 | 70.9 |       | 0.4 | 0.4 | 0.4 | 0.4 | 0.4 | 1 | T(SC)S(C)               |
| 116.6 | 63.8 | 175.4 | 32.3 | 20.5  | 0.3 | 0.3 | 0.3 | 0.3 | 0.3 | 1 | V(CHS)                  |
| 116.6 | 59.4 | 178.1 | 29.4 | 35.8  | 0.2 | 0.3 | 0.3 | 0.3 | 0.3 | 1 | E(HC)Q(H)R(H)           |
| 117.6 | 67.4 | 176.1 | 68   |       | 0.2 | 0.2 | 0.2 | 0.2 | 0.2 | 1 | T(HC)                   |
| 117   | 59.8 | 178.8 | 32.4 | 26.2  | 0.4 | 0.4 | 0.4 | 0.4 | 0.4 | 1 | K(H)Q(H)R(H)E(H)M(H)    |
| 117.9 | 56.6 | 179.2 | 38.9 | 175.7 | 0.3 | 0.4 | 0.4 | 0.4 | 0.4 | 1 | N(HC)D(H)               |
| 118.1 | 58.2 | 172.3 | 32.4 | 21.6  | 0.3 | 0.3 | 0.3 | 0.3 | 0.3 | 1 | V(SC)K(C)               |
| 118.3 | 57.5 | 171.6 | 42.5 | 127.5 | 0.3 | 0.3 | 0.3 | 0.3 | 0.3 | 1 | F(S)Y(S)                |
| 118.5 | 57.2 | 178.8 | 37.2 | 138.1 | 0.2 | 0.3 | 0.3 | 0.3 | 0.3 | 1 | F(H)Y(CH)H(HC)          |
| 118.8 | 54.9 | 177.7 | 31.3 | 35.5  | 0.2 | 0.2 | 0.2 | 0.2 | 0.2 | 1 | E(CS)K(CHS)R(C)M(C)Q(C) |
| 119.6 | 66.7 | 179.4 | 32.4 | 22.6  | 0.3 | 0.4 | 0.4 | 0.4 | 0.4 | 1 | V(HC)                   |
| 120   | 55.9 | 175.8 | 28.3 | 24.7  | 0.3 | 0.3 | 0.3 | 0.3 | 0.3 | 1 | K(C)R(C)Q(C)            |
| 121.3 | 55   | 182   | 18.7 |       | 0.5 | 0.5 | 0.5 | 0.5 | 0.5 | 1 | A(HC)                   |
| 121.3 | 60.5 | 179.7 | 32   | 27.7  | 0.5 | 0.4 | 0.4 | 0.4 | 0.4 | 1 | K(H)E(H)R(H)Q(H)        |
| 121.4 | 62   | 179.2 | 37.4 | 130.2 | 0.4 | 0.4 | 0.4 | 0.4 | 0.4 | 1 | Y(H)F(H)                |
| 121.5 | 59.7 | 179.6 | 33.3 | 26.2  | 0.4 | 0.4 | 0.4 | 0.4 | 0.4 | 1 | K(HC)Q(H)M(H)R(H)       |
| 121.4 | 54.2 | 174.4 | 34.5 | 35.4  | 0.3 | 0.3 | 0.3 | 0.3 | 0.3 | 1 | K(SC)E(S)R(S)M(S)       |
| 121.4 | 56.2 | 176.5 | 38.6 | 178.1 | 0.3 | 0.3 | 0.3 | 0.3 | 0.3 | 1 | N(H)D(CH)               |
| 121.6 | 59.2 | 177.9 | 29.3 | 34.5  | 0.3 | 0.3 | 0.3 | 0.3 | 0.3 | 1 | E(HC)Q(H)R(H)K(HC)      |
| 122   | 61.9 | 175.4 | 32.2 | 22.2  | 0.2 | 0.2 | 0.2 | 0.2 | 0.2 | 1 | V(SCH)                  |
| 122.9 | 55.1 | 173.5 | 36.5 | 25.9  | 0.2 | 0.2 | 0.2 | 0.2 | 0.2 | 1 | K(SC)R(S)E(S)           |
| 122.3 | 56.6 | 179.2 | 17.7 |       | 0.4 | 0.4 | 0.4 | 0.4 | 0.4 | 1 | A(H)                    |
| 123   | 56.7 | 174.7 | 43.4 | 128.2 | 0.3 | 0.3 | 0.3 | 0.3 | 0.3 | 1 | Y(S)F(SC)               |
| 123.1 | 54.3 | 177.2 | 42.7 | 179.5 | 0.3 | 0.3 | 0.3 | 0.3 | 0.3 | 1 | D(CSH)                  |
| 123.8 | 54.7 | 177   | 17.3 |       | 0.2 | 0.2 | 0.2 | 0.2 | 0.2 | 1 | A(HC)                   |
| 125.5 | 58   | 177.9 | 34.3 | 112.3 | 0.5 | 0.5 | 0.5 | 0.5 | 0.5 | 1 | W(CSH)                  |
| 125.5 | 51.1 | 176.8 | 38.8 | 177   | 0.4 | 0.4 | 0.4 | 0.4 | 0.4 | 1 | D(C)N(CS)               |
| 125.5 | 56.2 | 175.4 | 30.6 | 35.3  | 0.3 | 0.3 | 0.3 | 0.3 | 0.3 | 1 | E(CS)K(CS)R(CS)Q(C)     |
| 126.1 | 50.9 | 178   | 23.9 |       | 0.2 | 0.2 | 0.2 | 0.2 | 0.2 | 1 | A(SC)                   |
| 126.5 | 60.1 | 175.4 | 38   | 27.6  | 0.2 | 0.1 | 0.1 | 0.1 | 0.1 | 1 | I(SC)E(H)               |
| 127.6 | 54.2 | 173.7 | 42.9 | 27.7  | 0.2 | 0.2 | 0.2 | 0.2 | 0.2 | 1 | L(SC)                   |
| 130.7 | 56.9 | 176.1 | 43.4 | 140.3 | 0.4 | 0.3 | 0.3 | 0.3 | 0.3 | 1 | F(SC)Y(S)               |
| 131.4 | 53   | 175.1 | 41.9 | 180.9 | 0.3 | 0.2 | 0.2 | 0.2 | 0.2 | 1 | D(CS)                   |
| 131.3 | 57.8 | 180.5 | 33.3 | 38.8  | 0.2 | 0.2 | 0.2 | 0.2 | 0.2 | 1 | L(H)E(C)Q(H)            |

NCOCX

| 43    | 5    |       |      |       |     |     |     |     |     |   |            |
|-------|------|-------|------|-------|-----|-----|-----|-----|-----|---|------------|
| 106.4 | 59.3 | 179.2 | 32.9 | 25.8  | 0.2 | 0.2 | 0.2 | 0.2 | 0.2 | 1 | K(HC)      |
| 108.1 | 52.8 | 174.9 | 41.7 | 180.7 | 0.2 | 0.2 | 0.2 | 0.2 | 0.2 | 1 | D(CS)N(CS) |
| 108.4 | 53.5 | 174.3 | 40.4 | 176.9 | 0.3 | 0.3 | 0.3 | 0.3 | 0.3 | 1 | D(C)N(C)   |

|       |      |       |      |       |     |     |     |     |     |   |                    |
|-------|------|-------|------|-------|-----|-----|-----|-----|-----|---|--------------------|
| 109.2 | 57.5 | 177.4 | 33.8 | 111.8 | 0.2 | 0.2 | 0.2 | 0.2 | 0.2 | 1 | W(S)               |
| 109.6 | 50.7 | 176.4 | 38.4 | 176.6 | 0.2 | 0.2 | 0.2 | 0.2 | 0.2 | 1 | N(CSH)D(C)         |
| 112   | 55.6 | 175.5 | 28   | 24.4  | 0.4 | 0.4 | 0.4 | 0.4 | 0.4 | 1 | K(CS)R(C)L(HS)     |
| 112.2 | 56.6 | 175.8 | 43.1 | 140   | 0.3 | 0.3 | 0.3 | 0.3 | 0.3 | 1 | F(SC)Y(S)          |
| 115   | 55.9 | 176.2 | 38.3 | 177.8 | 0.2 | 0.2 | 0.2 | 0.2 | 0.2 | 1 | N(HC)D(HC)         |
| 115.2 | 53.9 | 174.1 | 34.2 | 35.1  | 0.4 | 0.4 | 0.4 | 0.4 | 0.4 | 1 | E(SC)Q(S)K(C)M(SC) |
| 115.5 | 63.5 | 175.1 | 32   | 20.2  | 0.4 | 0.4 | 0.4 | 0.4 | 0.4 | 1 | V(CSH)P(C)         |
| 116.1 | 60.1 | 172   | 70.5 |       | 0.3 | 0.4 | 0.4 | 0.4 | 0.4 | 1 | T(SC)              |
| 116.3 | 50.7 | 177.8 | 23.7 |       | 0.3 | 0.3 | 0.3 | 0.3 | 0.3 | 1 | A(SC)              |
| 116.4 | 55   | 177.3 | 17.6 |       | 0.2 | 0.3 | 0.3 | 0.3 | 0.3 | 1 | A(HC)              |
| 117.4 | 54.5 | 181.5 | 18.2 |       | 0.2 | 0.2 | 0.2 | 0.2 | 0.2 | 1 | A(HC)              |
| 117.4 | 59.1 | 177.8 | 29.1 | 35.5  | 0.4 | 0.4 | 0.4 | 0.4 | 0.4 | 1 | E(HC)Q(H)R(H)      |
| 118.2 | 56.1 | 179.6 | 18.1 |       | 0.3 | 0.4 | 0.4 | 0.4 | 0.4 | 1 | A(HC)              |
| 118.4 | 60.4 | 172.3 | 71.9 | 21.1  | 0.3 | 0.3 | 0.3 | 0.3 | 0.3 | 1 | T(SC)              |
| 118.6 | 60.9 | 174.7 | 73.1 |       | 0.3 | 0.3 | 0.3 | 0.3 | 0.3 | 1 | T(CS)              |
| 118.7 | 66.3 | 179   | 32   | 22.2  | 0.2 | 0.3 | 0.3 | 0.3 | 0.3 | 1 | V(H)               |
| 119   | 45.1 | 172.8 |      |       | 0.2 | 0.2 | 0.2 | 0.2 | 0.2 | 1 | G(CS)              |
| 119   | 54.6 | 177.5 | 43   | 179.8 | 0.2 | 0.2 | 0.2 | 0.2 | 0.2 | 1 | D(CH)N(H)          |
| 119.3 | 60.2 | 179.2 | 32.8 | 26.5  | 0.3 | 0.4 | 0.4 | 0.4 | 0.4 | 1 | K(HC)E(H)          |
| 119.7 | 60.3 | 175.4 | 69.9 |       | 0.3 | 0.3 | 0.3 | 0.3 | 0.3 | 1 | T(CSH)             |
| 120.8 | 57.5 | 179.1 | 37.5 | 138.4 | 0.5 | 0.4 | 0.4 | 0.4 | 0.4 | 1 | F(HC)Y(HC)         |
| 121   | 58.9 | 177.6 | 29   | 34.2  | 0.4 | 0.4 | 0.4 | 0.4 | 0.4 | 1 | Q(HC)E(HC)         |
| 121.1 | 44.7 | 173.2 |      |       | 0.4 | 0.4 | 0.4 | 0.4 | 0.4 | 1 | G(CS)              |
| 121.1 | 44.9 | 171.4 |      |       | 0.3 | 0.3 | 0.3 | 0.3 | 0.3 | 1 | G(CS)              |
| 121.1 | 57   | 179.6 | 39.3 | 176.1 | 0.3 | 0.3 | 0.3 | 0.3 | 0.3 | 1 | D(HC)N(H)          |
| 121.3 | 60.1 | 179.3 | 31.6 | 27.3  | 0.3 | 0.3 | 0.3 | 0.3 | 0.3 | 1 | K(H)R(H)           |
| 121.8 | 46.8 | 174   |      |       | 0.2 | 0.2 | 0.2 | 0.2 | 0.2 | 1 | G(CHS)             |
| 122.7 | 57   | 175   | 43.7 | 128.5 | 0.2 | 0.2 | 0.2 | 0.2 | 0.2 | 1 | F(SC)Y(S)          |
| 122.7 | 61.6 | 178.8 | 37   | 129.8 | 0.4 | 0.4 | 0.4 | 0.4 | 0.4 | 1 | F(H)Y(HC)          |
| 123.3 | 55.9 | 175.1 | 30.3 | 35    | 0.3 | 0.3 | 0.3 | 0.3 | 0.3 | 1 | E(CS)K(CS)Q(CSH)   |
| 123.3 | 54.4 | 173.9 | 43.1 | 27.9  | 0.3 | 0.3 | 0.3 | 0.3 | 0.3 | 1 | L(SC)R(SC)         |
| 124   | 67.2 | 175.9 | 67.8 |       | 0.2 | 0.2 | 0.2 | 0.2 | 0.2 | 1 | T(HC)              |
| 124.1 | 58.5 | 172.6 | 32.7 | 21.9  | 0.2 | 0.2 | 0.2 | 0.2 | 0.2 | 1 | V(SC)K(HC)         |
| 125   | 55.1 | 177.9 | 31.5 | 35.7  | 0.5 | 0.5 | 0.5 | 0.5 | 0.5 | 1 | E(SCH)M(C)R(S)Q(C) |
| 126.3 | 57.8 | 171.9 | 42.7 | 127.8 | 0.4 | 0.4 | 0.4 | 0.4 | 0.4 | 1 | F(S)Y(S)           |
| 127   | 54.9 | 173.3 | 36.3 | 25.7  | 0.3 | 0.3 | 0.3 | 0.3 | 0.3 | 1 | K(SC)              |
| 127.1 | 60   | 175.3 | 37.9 | 27.5  | 0.2 | 0.2 | 0.2 | 0.2 | 0.2 | 1 | I(SCH)R(H)         |
| 127.8 | 61.9 | 173.4 | 69.5 |       | 0.2 | 0.2 | 0.2 | 0.2 | 0.2 | 1 | T(CSH)             |
| 130.3 | 62.5 | 174.4 | 71.7 |       | 0.4 | 0.3 | 0.3 | 0.3 | 0.3 | 1 | T(SCH)             |
| 131.1 | 61.7 | 175.2 | 32   | 22    | 0.3 | 0.2 | 0.2 | 0.2 | 0.2 | 1 | V(SCH)             |

**Table S3.** Residues in GB1 that are randomly and independently deleted from the NCOCX and NCACX peak lists.

|                                                               |   |    |    |    |    |    |    |    |    |    |    |    |
|---------------------------------------------------------------|---|----|----|----|----|----|----|----|----|----|----|----|
| Residues corresponding to the deleted peaks in the NCACX list | 3 | 8  | 24 | 25 | 34 | 37 | 45 | 48 | 49 | 50 | 52 | 55 |
| Residues corresponding to the deleted peaks in the NCOCX list | 8 | 12 | 16 | 22 | 26 | 30 | 31 | 36 | 39 | 42 | 45 | 53 |

**Table S4.** GB1 peak lists with random and independent deletion of 20% of the peaks.

NCACX

| 44    | 5    |       |      |       |     |     |     |     |     |   |                         |
|-------|------|-------|------|-------|-----|-----|-----|-----|-----|---|-------------------------|
| 39.5  | 54.6 | 171.7 | 32.8 | 30.6  | 0.5 | 0.3 | 0.3 | 0.3 | 0.3 | 1 | K(C)M(C)                |
| 105.9 | 45.2 | 171.7 |      |       | 0.3 | 0.3 | 0.3 | 0.3 | 0.3 | 1 | G(CSH)                  |
| 106.6 | 62.1 | 173.6 | 69.7 |       | 0.2 | 0.2 | 0.2 | 0.2 | 0.2 | 1 | T(CSH)                  |
| 108.3 | 45.3 | 173   |      |       | 0.2 | 0.2 | 0.2 | 0.2 | 0.2 | 1 | G(CS)                   |
| 108.1 | 46.5 | 173.7 |      |       | 0.3 | 0.3 | 0.3 | 0.3 | 0.3 | 1 | G(CHS)                  |
| 109   | 60.7 | 174.5 | 72.9 |       | 0.2 | 0.2 | 0.2 | 0.2 | 0.2 | 1 | T(CS)                   |
| 109.4 | 44.5 | 173   |      |       | 0.2 | 0.2 | 0.2 | 0.2 | 0.2 | 1 | G(CS)                   |
| 112.4 | 62.9 | 174.8 | 72.1 |       | 0.4 | 0.4 | 0.4 | 0.4 | 0.4 | 1 | T(CSH)                  |
| 112.5 | 60.7 | 172.6 | 72.2 | 21.4  | 0.3 | 0.3 | 0.3 | 0.3 | 0.3 | 1 | T(SC)                   |
| 115.6 | 60.5 | 172.4 | 70.9 |       | 0.4 | 0.4 | 0.4 | 0.4 | 0.4 | 1 | T(SC)                   |
| 115.9 | 52.9 | 175.5 | 42.7 | 180.3 | 0.4 | 0.4 | 0.4 | 0.4 | 0.4 | 1 | D(CS)N(C)               |
| 116.4 | 60.7 | 174.7 | 73   |       | 0.3 | 0.4 | 0.4 | 0.4 | 0.4 | 1 | T(SC)                   |
| 116.6 | 61.6 | 171.6 | 71.1 |       | 0.3 | 0.3 | 0.3 | 0.3 | 0.3 | 1 | T(SC)                   |
| 116.6 | 63.8 | 175.4 | 32.3 | 20.5  | 0.3 | 0.3 | 0.3 | 0.3 | 0.3 | 1 | V(CHS)                  |
| 116.6 | 59.4 | 178.1 | 29.4 | 35.8  | 0.2 | 0.3 | 0.3 | 0.3 | 0.3 | 1 | E(HC)Q(H)R(H)           |
| 117   | 59.8 | 178.8 | 32.4 | 26.2  | 0.4 | 0.4 | 0.4 | 0.4 | 0.4 | 1 | K(H)Q(H)R(H)E(H)M(H)    |
| 117.9 | 56.6 | 179.2 | 38.9 | 175.7 | 0.3 | 0.4 | 0.4 | 0.4 | 0.4 | 1 | N(HC)D(H)               |
| 118.1 | 58.2 | 172.3 | 32.4 | 21.6  | 0.3 | 0.3 | 0.3 | 0.3 | 0.3 | 1 | V(SC)K(C)               |
| 118.5 | 57.2 | 178.8 | 37.2 | 138.1 | 0.2 | 0.3 | 0.3 | 0.3 | 0.3 | 1 | F(H)Y(CH)H(HC)          |
| 118.8 | 54.9 | 177.7 | 31.3 | 35.5  | 0.2 | 0.2 | 0.2 | 0.2 | 0.2 | 1 | E(CS)K(CHS)R(C)M(C)Q(C) |
| 119.6 | 66.7 | 179.4 | 32.4 | 22.6  | 0.3 | 0.4 | 0.4 | 0.4 | 0.4 | 1 | V(HC)                   |
| 121.3 | 60.5 | 179.7 | 32   | 27.7  | 0.5 | 0.4 | 0.4 | 0.4 | 0.4 | 1 | K(H)E(H)R(H)Q(H)        |
| 121.4 | 62   | 179.2 | 37.4 | 130.2 | 0.4 | 0.4 | 0.4 | 0.4 | 0.4 | 1 | Y(H)F(H)                |
| 121.5 | 59.7 | 179.6 | 33.3 | 26.2  | 0.4 | 0.4 | 0.4 | 0.4 | 0.4 | 1 | K(HC)Q(H)M(H)R(H)       |
| 121.4 | 54.2 | 174.4 | 34.5 | 35.4  | 0.3 | 0.3 | 0.3 | 0.3 | 0.3 | 1 | K(SC)E(S)R(S)M(S)       |
| 121.4 | 56.2 | 176.5 | 38.6 | 178.1 | 0.3 | 0.3 | 0.3 | 0.3 | 0.3 | 1 | N(H)D(CH)               |
| 121.6 | 59.2 | 177.9 | 29.3 | 34.5  | 0.3 | 0.3 | 0.3 | 0.3 | 0.3 | 1 | E(HC)Q(H)R(H)K(HC)      |
| 122   | 61.9 | 175.4 | 32.2 | 22.2  | 0.2 | 0.2 | 0.2 | 0.2 | 0.2 | 1 | V(SCH)                  |
| 122.9 | 55.1 | 173.5 | 36.5 | 25.9  | 0.2 | 0.2 | 0.2 | 0.2 | 0.2 | 1 | K(SC)R(S)E(S)           |
| 122.4 | 54.2 | 179.3 | 17.8 |       | 0.4 | 0.4 | 0.4 | 0.4 | 0.4 | 1 | A(HC)                   |
| 123   | 52.9 | 175.4 | 38.4 | 25.7  | 0.3 | 0.3 | 0.3 | 0.3 | 0.3 | 1 | N(CH)L(CS)D(C)K(SC)     |
| 123.1 | 54.3 | 177.2 | 42.7 | 179.5 | 0.3 | 0.3 | 0.3 | 0.3 | 0.3 | 1 | D(CSH)                  |
| 123.8 | 54.7 | 177   | 17.3 |       | 0.2 | 0.2 | 0.2 | 0.2 | 0.2 | 1 | A(HC)                   |
| 125.5 | 58   | 177.9 | 34.3 | 112.3 | 0.5 | 0.5 | 0.5 | 0.5 | 0.5 | 1 | W(CSH)                  |
| 125.5 | 56.2 | 175.4 | 30.6 | 35.3  | 0.3 | 0.3 | 0.3 | 0.3 | 0.3 | 1 | E(CS)K(CS)R(CS)Q(C)     |
| 125.6 | 54.5 | 176.1 | 30.8 | 36    | 0.2 | 0.2 | 0.2 | 0.2 | 0.2 | 1 | E(CS)K(CS)R(S)          |
| 126.1 | 50.9 | 178   | 23.9 |       | 0.2 | 0.2 | 0.2 | 0.2 | 0.2 | 1 | A(SC)                   |
| 126.5 | 60.1 | 175.4 | 38   | 27.6  | 0.2 | 0.1 | 0.1 | 0.1 | 0.1 | 1 | I(SC)E(H)               |
| 125.9 | 50.5 | 175.9 | 42.2 | 179.8 | 0.4 | 0.4 | 0.4 | 0.4 | 0.4 | 1 | D(CS)N(C)               |
| 126.7 | 52.7 | 174.5 | 42.2 | 27.1  | 0.3 | 0.3 | 0.3 | 0.3 | 0.3 | 1 | L(SC)                   |

|       |      |       |      |       |     |     |     |     |     |   |              |
|-------|------|-------|------|-------|-----|-----|-----|-----|-----|---|--------------|
| 126.9 | 54.5 | 174.9 | 42.7 | 27    | 0.2 | 0.2 | 0.2 | 0.2 | 0.2 | 1 | L(SC)        |
| 127.6 | 54.2 | 173.7 | 42.9 | 27.7  | 0.2 | 0.2 | 0.2 | 0.2 | 0.2 | 1 | L(SC)        |
| 131.4 | 53   | 175.1 | 41.9 | 180.9 | 0.3 | 0.2 | 0.2 | 0.2 | 0.2 | 1 | D(CS)        |
| 131.3 | 57.8 | 180.5 | 33.3 | 38.8  | 0.2 | 0.2 | 0.2 | 0.2 | 0.2 | 1 | L(H)E(C)Q(H) |

### NCOCX

| 43    | 5    |       |      |       |     |     |     |     |     |   |                    |
|-------|------|-------|------|-------|-----|-----|-----|-----|-----|---|--------------------|
| 104.2 | 54   | 179.7 | 19   |       | 0.3 | 0.4 | 0.4 | 0.4 | 0.4 | 1 | A(HC)              |
| 105.6 | 53.3 | 175.8 | 38.8 | 26.1  | 0.3 | 0.3 | 0.3 | 0.3 | 0.3 | 1 | N(C)L(CS)R(C)K(SC) |
| 106.4 | 59.3 | 179.2 | 32.9 | 25.8  | 0.2 | 0.2 | 0.2 | 0.2 | 0.2 | 1 | K(HC)              |
| 108.1 | 52.8 | 174.9 | 41.7 | 180.7 | 0.2 | 0.2 | 0.2 | 0.2 | 0.2 | 1 | D(CS)N(CS)         |
| 108.4 | 53.5 | 174.3 | 40.4 | 176.9 | 0.3 | 0.3 | 0.3 | 0.3 | 0.3 | 1 | D(C)N(C)           |
| 109.2 | 57.5 | 177.4 | 33.8 | 111.8 | 0.2 | 0.2 | 0.2 | 0.2 | 0.2 | 1 | W(S)               |
| 112   | 55.6 | 175.5 | 28   | 24.4  | 0.4 | 0.4 | 0.4 | 0.4 | 0.4 | 1 | K(CS)R(C)L(HS)     |
| 112.2 | 56.6 | 175.8 | 43.1 | 140   | 0.3 | 0.3 | 0.3 | 0.3 | 0.3 | 1 | F(SC)Y(S)          |
| 115.2 | 53.9 | 174.1 | 34.2 | 35.1  | 0.4 | 0.4 | 0.4 | 0.4 | 0.4 | 1 | E(SC)Q(S)K(C)M(SC) |
| 115.5 | 63.5 | 175.1 | 32   | 20.2  | 0.4 | 0.4 | 0.4 | 0.4 | 0.4 | 1 | V(CSH)P(C)         |
| 116.3 | 60.3 | 174.3 | 72.6 |       | 0.3 | 0.3 | 0.3 | 0.3 | 0.3 | 1 | T(SC)              |
| 116.3 | 50.7 | 177.8 | 23.7 |       | 0.3 | 0.3 | 0.3 | 0.3 | 0.3 | 1 | A(SC)              |
| 117.4 | 54.5 | 181.5 | 18.2 |       | 0.2 | 0.2 | 0.2 | 0.2 | 0.2 | 1 | A(HC)              |
| 117.4 | 59.1 | 177.8 | 29.1 | 35.5  | 0.4 | 0.4 | 0.4 | 0.4 | 0.4 | 1 | E(HC)Q(H)R(H)      |
| 118.2 | 56.1 | 179.6 | 18.1 |       | 0.3 | 0.4 | 0.4 | 0.4 | 0.4 | 1 | A(HC)              |
| 118.6 | 60.9 | 174.7 | 73.1 |       | 0.3 | 0.3 | 0.3 | 0.3 | 0.3 | 1 | T(CS)              |
| 118.7 | 66.3 | 179   | 32   | 22.2  | 0.2 | 0.3 | 0.3 | 0.3 | 0.3 | 1 | V(H)               |
| 119   | 45.1 | 172.8 |      |       | 0.2 | 0.2 | 0.2 | 0.2 | 0.2 | 1 | G(CS)              |
| 119   | 54.6 | 177.5 | 43   | 179.8 | 0.2 | 0.2 | 0.2 | 0.2 | 0.2 | 1 | D(CH)N(H)          |
| 119.3 | 60.2 | 179.2 | 32.8 | 26.5  | 0.3 | 0.4 | 0.4 | 0.4 | 0.4 | 1 | K(HC)E(H)          |
| 119.7 | 60.3 | 175.4 | 69.9 |       | 0.3 | 0.3 | 0.3 | 0.3 | 0.3 | 1 | T(CSH)             |
| 120.8 | 54.6 | 179.7 | 18.2 |       | 0.5 | 0.5 | 0.5 | 0.5 | 0.5 | 1 | A(HC)              |
| 121   | 58.9 | 177.6 | 29   | 34.2  | 0.4 | 0.4 | 0.4 | 0.4 | 0.4 | 1 | Q(HC)E(HC)         |
| 121.1 | 44.7 | 173.2 |      |       | 0.4 | 0.4 | 0.4 | 0.4 | 0.4 | 1 | G(CS)              |
| 121.1 | 44.9 | 171.4 |      |       | 0.3 | 0.3 | 0.3 | 0.3 | 0.3 | 1 | G(CS)              |
| 121.1 | 57   | 179.6 | 39.3 | 176.1 | 0.3 | 0.3 | 0.3 | 0.3 | 0.3 | 1 | D(HC)N(H)          |
| 121.8 | 46.8 | 174   |      |       | 0.2 | 0.2 | 0.2 | 0.2 | 0.2 | 1 | G(CHS)             |
| 122.7 | 57   | 175   | 43.7 | 128.5 | 0.2 | 0.2 | 0.2 | 0.2 | 0.2 | 1 | F(SC)Y(S)          |
| 122.7 | 61.6 | 178.8 | 37   | 129.8 | 0.4 | 0.4 | 0.4 | 0.4 | 0.4 | 1 | F(H)Y(HC)          |
| 123.3 | 55.9 | 175.1 | 30.3 | 35    | 0.3 | 0.3 | 0.3 | 0.3 | 0.3 | 1 | E(CS)K(CS)Q(CSH)   |
| 123.4 | 50.9 | 176.3 | 42.6 | 180.2 | 0.3 | 0.3 | 0.3 | 0.3 | 0.3 | 1 | D(CS)N(C)          |
| 124   | 67.2 | 175.9 | 67.8 |       | 0.2 | 0.2 | 0.2 | 0.2 | 0.2 | 1 | T(HC)              |
| 124.1 | 58.5 | 172.6 | 32.7 | 21.9  | 0.2 | 0.2 | 0.2 | 0.2 | 0.2 | 1 | V(SC)K(HC)         |
| 125.1 | 54.7 | 175.1 | 42.9 | 27.2  | 0.4 | 0.4 | 0.4 | 0.4 | 0.4 | 1 | L(CSH)             |
| 125.2 | 54.3 | 171.4 | 32.5 | 30.3  | 0.3 | 0.3 | 0.3 | 0.3 | 0.3 | 1 | K(CH)M(CH)         |
| 125.4 | 61.3 | 171.3 | 70.8 |       | 0.2 | 0.2 | 0.2 | 0.2 | 0.2 | 1 | T(SC)              |
| 125.9 | 54.3 | 175.9 | 30.6 | 35.8  | 0.2 | 0.2 | 0.2 | 0.2 | 0.2 | 1 | E(CS)              |
| 126.3 | 53   | 174.8 | 42.5 | 27.4  | 0.2 | 0.1 | 0.1 | 0.1 | 0.1 | 1 | L(SC)              |
| 127   | 54.9 | 173.3 | 36.3 | 25.7  | 0.3 | 0.3 | 0.3 | 0.3 | 0.3 | 1 | K(SC)              |
| 127.1 | 60   | 175.3 | 37.9 | 27.5  | 0.2 | 0.2 | 0.2 | 0.2 | 0.2 | 1 | I(SCH)R(H)         |
| 127.8 | 61.9 | 173.4 | 69.5 |       | 0.2 | 0.2 | 0.2 | 0.2 | 0.2 | 1 | T(CSH)             |
| 130.3 | 62.5 | 174.4 | 71.7 |       | 0.4 | 0.3 | 0.3 | 0.3 | 0.3 | 1 | T(SCH)             |
| 131.1 | 61.3 | 174.2 | 72.1 |       | 0.2 | 0.2 | 0.2 | 0.2 | 0.2 | 1 | T(SC)              |



**Table S5.** HET-s peak lists.

NCACX

| 57    | 4    |       |      |     |     |     |     |   |                                              |
|-------|------|-------|------|-----|-----|-----|-----|---|----------------------------------------------|
| 116.2 | 59.4 | 173.5 | 66.8 | 0.6 | 0.5 | 0.5 | 0.5 | 1 | S(C)T(C)                                     |
| 125.6 | 52.2 | 174.7 | 39.6 | 0.6 | 0.5 | 0.5 | 0.5 | 1 | D(C)N(C)                                     |
| 128.0 | 52.5 | 174.8 | 41.1 | 0.6 | 0.5 | 0.5 | 0.5 | 1 | D(C)L(CS)N(S)                                |
| 109.2 | 44.2 | 174.9 |      | 0.6 | 0.5 | 0.5 | 0.5 | 1 | G(C)                                         |
| 114.3 | 43.7 | 170.7 |      | 0.6 | 0.5 | 0.5 | 0.5 | 1 | G(SC)                                        |
| 118.1 | 54.8 | 174.8 | 35.4 | 0.6 | 0.5 | 0.5 | 0.5 | 1 | K(SC)R(S)E(S)                                |
| 127.3 | 59.3 | 175.7 | 29.7 | 0.6 | 0.5 | 0.5 | 0.5 | 1 | E(CHS)C(C)I(S)                               |
| 118.1 | 54.5 | 173.7 |      | 0.6 | 0.5 | 0.5 | 0.5 | 1 | N(C)R(SC)D(C)E(SC)K(CS)Q(S)<br>C(H(CS)L(SH)) |
| 120.6 | 58.4 | 178.6 | 41.7 | 0.6 | 0.5 | 0.5 | 0.5 | 1 | L(H)                                         |
| 130.1 | 58.5 | 173.1 | 35.5 | 0.6 | 0.5 | 0.5 | 0.5 | 1 | V(S)I(S)                                     |
| 128.9 | 61.3 | 175.1 | 32.1 | 0.6 | 0.5 | 0.5 | 0.5 | 1 | V(S)                                         |
| 123.2 | 61.9 | 174.2 | 34.6 | 0.6 | 0.5 | 0.5 | 0.5 | 1 | V(S)                                         |
| 116.1 | 48.3 | 172.0 |      | 0.6 | 0.5 | 0.5 | 0.5 | 1 | G(C)                                         |
| 131.4 | 52.6 | 172.6 | 44.8 | 0.6 | 0.5 | 0.5 | 0.5 | 1 | L(S)                                         |
| 125.8 | 57.1 | 177.4 | 33.3 | 0.6 | 0.5 | 0.5 | 0.5 | 1 | K(C)                                         |
| 113.5 | 59.8 | 174.3 | 72.1 | 0.6 | 0.5 | 0.5 | 0.5 | 1 | T(SC)                                        |
| 129.0 | 54.2 | 176.6 | 29.9 | 0.6 | 0.5 | 0.5 | 0.5 | 1 | E(CS)                                        |
| 110.2 | 45.8 | 174.4 |      | 0.6 | 0.5 | 0.5 | 0.5 | 1 | G(C)                                         |
| 119.5 | 56.9 | 171.6 | 67.4 | 0.6 | 0.5 | 0.5 | 0.5 | 1 | S(S)                                         |
| 123.2 | 49.8 | 177.1 | 24.1 | 0.6 | 0.5 | 0.5 | 0.5 | 1 | A(S)                                         |
| 124.0 | 60.9 | 175.1 | 35.5 | 0.6 | 0.5 | 0.5 | 0.5 | 1 | V(S)                                         |
| 113.7 | 44.9 | 172.1 |      | 0.6 | 0.5 | 0.5 | 0.5 | 1 | G(C)                                         |
| 122.0 | 54.5 | 176.7 | 35.4 | 0.6 | 0.5 | 0.5 | 0.5 | 1 | K(SC)                                        |
| 125.7 | 59.3 | 175.8 | 32.2 | 0.6 | 0.5 | 0.5 | 0.5 | 1 | V(SC)K(HC)                                   |
| 109.7 | 43.6 | 178.8 |      | 0.6 | 0.5 | 0.5 | 0.5 | 1 | G(CS)                                        |
| 128.8 | 56.2 | 176.7 | 40.2 | 0.6 | 0.5 | 0.5 | 0.5 | 1 | D(C)L(C)Y(S)                                 |
| 130.1 | 54.0 | 175.3 | 33.2 | 0.6 | 0.5 | 0.5 | 0.5 | 1 | R(S)K(SC)E(S)                                |
| 126.7 | 52.5 | 173.2 | 32.7 | 0.6 | 0.5 | 0.5 | 0.5 | 1 | R(S)E(S)V(S)K(C)Q(S)                         |
| 119.5 | 55.0 | 179.0 | 18.6 | 0.6 | 0.5 | 0.5 | 0.5 | 1 | A(H)                                         |
| 113.0 | 60.9 | 172.7 | 71.7 | 0.6 | 0.5 | 0.5 | 0.5 | 1 | T(SC)                                        |
| 122.5 | 66.0 | 175.4 | 70.2 | 0.6 | 0.5 | 0.5 | 0.5 | 1 | T(CHS)                                       |
| 128.4 | 61.1 | 174.9 | 34.0 | 0.6 | 0.5 | 0.5 | 0.5 | 1 | V(S)                                         |
| 120.3 | 54.8 | 175.0 | 33.4 | 0.6 | 0.5 | 0.5 | 0.5 | 1 | E(SC)K(CS)R(S)                               |
| 123.4 | 59.7 | 175.1 | 32.5 | 0.6 | 0.5 | 0.5 | 0.5 | 1 | V(SC)K(HCS)                                  |
| 122.7 | 60.1 | 172.7 | 35.8 | 0.6 | 0.5 | 0.5 | 0.5 | 1 | V(S)                                         |
| 116.3 | 62.5 | 175.4 | 70.9 | 0.6 | 0.5 | 0.5 | 0.5 | 1 | T(CS)                                        |
| 118.0 | 57.4 | 175.5 | 29.4 | 0.6 | 0.5 | 0.5 | 0.5 | 1 | E(CH)Q(CH)K(C)R(CH)W(C)                      |
| 123.8 | 61.3 | 172.2 | 70.6 | 0.6 | 0.5 | 0.5 | 0.5 | 1 | T(S)                                         |
| 123.1 | 59.9 | 173.0 | 36.8 | 0.6 | 0.5 | 0.5 | 0.5 | 1 | V(S)                                         |
| 120.8 | 54.0 | 178.3 | 18.9 | 0.6 | 0.5 | 0.5 | 0.5 | 1 | A(HC)                                        |
| 122.6 | 54.8 | 176.2 | 30.5 | 0.6 | 0.5 | 0.5 | 0.5 | 1 | E(C)R(C)                                     |
| 129.1 | 62.0 | 175.1 | 38.3 | 0.6 | 0.5 | 0.5 | 0.5 | 1 | I(SC)                                        |
| 126.3 | 53.3 | 176.1 | 20.1 | 0.6 | 0.5 | 0.5 | 0.5 | 1 | A(C)                                         |
| 125.2 | 57.0 | 174.4 | 35.7 | 0.6 | 0.5 | 0.5 | 0.5 | 1 | V(S)K(CS)                                    |
| 113.3 | 44.2 | 173.0 |      | 0.6 | 0.5 | 0.5 | 0.5 | 1 | G(CS)                                        |
| 117.7 | 58.9 | 174.0 | 27.3 | 0.6 | 0.5 | 0.5 | 0.5 | 1 | E(CH)I(S)R(H)Q(H)L(H)                        |
| 120.5 | 54.1 | 173.7 | 33.8 | 0.6 | 0.5 | 0.5 | 0.5 | 1 | E(S)R(S)K(CS)Q(S)                            |
| 127.4 | 59.7 | 175.3 | 41.4 | 0.6 | 0.5 | 0.5 | 0.5 | 1 | I(S)F(C)                                     |
| 115.1 | 52.0 | 173.0 | 40.3 | 0.6 | 0.5 | 0.5 | 0.5 | 1 | N(CS)D(C)                                    |

|       |      |       |      |     |     |     |     |   |               |
|-------|------|-------|------|-----|-----|-----|-----|---|---------------|
| 117.5 | 56.6 | 171.9 | 66.3 | 0.6 | 0.5 | 0.5 | 0.5 | 1 | S(SC)         |
| 109.9 | 51.2 | 175.8 | 40.1 | 0.6 | 0.5 | 0.5 | 0.5 | 1 | D(C)N(CS)F(H) |
| 121.6 | 56.4 | 179.1 | 17.2 | 0.6 | 0.5 | 0.5 | 0.5 | 1 | A(H)          |
| 111.5 | 43.8 | 172.0 |      | 0.6 | 0.5 | 0.5 | 0.5 | 1 | G(CS)         |
| 118.2 | 54.6 | 175.5 | 33.1 | 0.6 | 0.5 | 0.5 | 0.5 | 1 | E(S)K(C)R(S)  |
| 130.8 | 52.7 | 173.6 | 43.7 | 0.6 | 0.5 | 0.5 | 0.5 | 1 | L(S)          |
| 123.0 | 60.6 | 174.8 | 41.8 | 0.6 | 0.5 | 0.5 | 0.5 | 1 | I(S)          |
| 118.4 | 53.1 | 174.3 | 45.0 | 0.6 | 0.5 | 0.5 | 0.5 | 1 | L(SC)N(C)D(S) |

NCOCX

55

4

|       |      |       |      |     |     |     |     |   |                                                              |
|-------|------|-------|------|-----|-----|-----|-----|---|--------------------------------------------------------------|
| 122.8 | 54.8 | 174.5 | 35.2 | 0.6 | 0.5 | 0.5 | 0.5 | 1 | K(SC)E(S)R(S)                                                |
| 124.3 | 66.0 | 175.4 | 69.7 | 0.6 | 0.5 | 0.5 | 0.5 | 1 | T(CH)                                                        |
| 130.9 | 60.5 | 172.7 | 36.2 | 0.6 | 0.5 | 0.5 | 0.5 | 1 | V(S)                                                         |
| 118.7 | 53.4 | 176.1 | 20.1 | 0.6 | 0.5 | 0.5 | 0.5 | 1 | A(CS)                                                        |
| 130.1 | 60.6 | 174.7 | 41.7 | 0.6 | 0.5 | 0.5 | 0.5 | 1 | I(S)                                                         |
| 118.2 | 59.0 | 173.4 | 66.8 | 0.6 | 0.5 | 0.5 | 0.5 | 1 | S(CS)T(C)                                                    |
| 119.0 | 52.4 | 174.5 | 40.0 | 0.6 | 0.5 | 0.5 | 0.5 | 1 | N(CS)D(C)L(C)                                                |
| 123.4 | 51.4 | 176.1 | 40.2 | 0.6 | 0.5 | 0.5 | 0.5 | 1 | D(C)N(CS)                                                    |
| 131.6 | 53.1 | 173.3 | 33.3 | 0.6 | 0.5 | 0.5 | 0.5 | 1 | R(S)K(CS)E(SC)Q(CS)H(S)                                      |
| 122.7 | 53.0 | 174.3 | 44.9 | 0.6 | 0.5 | 0.5 | 0.5 | 1 | L(SC)D(S)                                                    |
| 120.6 | 59.8 | 174.4 | 71.9 | 0.6 | 0.5 | 0.5 | 0.5 | 1 | T(SC)                                                        |
| 127.6 | 57.4 | 174.7 | 35.6 | 0.6 | 0.5 | 0.5 | 0.5 | 1 | V(S)K(CS)I(S)E(CSH)Y(H)R(S)M(C)F(C)                          |
| 113.9 | 61.2 | 175.0 | 34.3 | 0.6 | 0.5 | 0.5 | 0.5 | 1 | V(SC)                                                        |
| 118.0 | 59.8 | 175.3 | 41.3 | 0.6 | 0.5 | 0.5 | 0.5 | 1 | I(SC)F(C)                                                    |
| 130.5 | 52.7 | 174.0 | 43.5 | 0.6 | 0.5 | 0.5 | 0.5 | 1 | L(SC)D(SC)N(S)                                               |
| 113.5 | 46.4 | 174.2 |      | 0.6 | 0.5 | 0.5 | 0.5 | 1 | G(CHS)                                                       |
| 109.5 | 59.0 | 176.1 | 32.6 | 0.6 | 0.5 | 0.5 | 0.5 | 1 | K(CH)V(CS)C(C)                                               |
| 128.0 | 61.2 | 172.6 | 70.7 | 0.6 | 0.5 | 0.5 | 0.5 | 1 | T(SC)                                                        |
| 118.2 | 44.1 | 178.5 |      | 0.6 | 0.5 | 0.5 | 0.5 | 1 | L(HSC)G(C)D(CS)                                              |
| 113.8 | 54.0 | 175.7 | 33.3 | 0.6 | 0.5 | 0.5 | 0.5 | 1 | K(C)E(SC)R(SC)Q(SC)M(C)                                      |
| 128.9 | 54.5 | 174.7 | 33.3 | 0.6 | 0.5 | 0.5 | 0.5 | 1 | E(SC)R(SC)K(CS)Q(SC)M(C)                                     |
| 123.7 | 49.6 | 176.8 | 24.1 | 0.6 | 0.5 | 0.5 | 0.5 | 1 | A(S)                                                         |
| 125.8 | 56.4 | 171.3 | 66.1 | 0.6 | 0.5 | 0.5 | 0.5 | 1 | S(SC)                                                        |
| 120.8 | 53.9 | 178.3 | 18.9 | 0.6 | 0.5 | 0.5 | 0.5 | 1 | A(HC)                                                        |
| 126.9 | 59.8 | 173.3 | 37.3 | 0.6 | 0.5 | 0.5 | 0.5 | 1 | I(SCH)V(SC)Y(HC)E(H)F(CH)T(S)C)N(C)M(S)S(C)                  |
| 126.1 | 54.9 | 174.0 |      | 0.6 | 0.5 | 0.5 | 0.5 | 1 | K(SC)E(SC)R(SC)N(C)H(CS)Q(S)C)D(C)L(S)F(SC)C(C)Y(CS)Q(C)M(S) |
| 121.9 | 44.6 | 172.2 |      | 0.6 | 0.5 | 0.5 | 0.5 | 1 | G(CSH)                                                       |
| 121.5 | 62.6 | 175.4 | 70.6 | 0.6 | 0.5 | 0.5 | 0.5 | 1 | T(CSH)                                                       |
| 117.6 | 52.2 | 174.7 | 41.2 | 0.6 | 0.5 | 0.5 | 0.5 | 1 | D(CS)N(SC)L(C)                                               |
| 118.0 | 59.9 | 175.0 | 33.0 | 0.6 | 0.5 | 0.5 | 0.5 | 1 | V(SC)K(C)                                                    |
| 123.2 | 55.0 | 175.8 | 32.8 | 0.6 | 0.5 | 0.5 | 0.5 | 1 | E(SC)K(CH)M(C)R(SC)Q(S)                                      |
| 111.9 | 58.4 | 173.6 | 35.5 | 0.6 | 0.5 | 0.5 | 0.5 | 1 | V(SC)S(C)I(CS)                                               |
| 116.8 | 54.0 | 176.5 | 30.1 | 0.6 | 0.5 | 0.5 | 0.5 | 1 | E(CS)R(CS)Q(CS)K(C)                                          |
| 125.6 | 55.1 | 176.0 | 31.0 | 0.6 | 0.5 | 0.5 | 0.5 | 1 | R(CS)E(SC)Q(CS)K(C)                                          |
| 123.0 | 56.6 | 171.6 | 67.2 | 0.6 | 0.5 | 0.5 | 0.5 | 1 | S(SC)                                                        |
| 110.3 | 55.9 | 176.3 | 40.2 | 0.6 | 0.5 | 0.5 | 0.5 | 1 | D(CH)Y(S)L(HC)                                               |
| 123.0 | 59.0 | 173.9 | 27.5 | 0.6 | 0.5 | 0.5 | 0.5 | 1 | R(CH)C(CS)L(H)E(C)Q(H)V(S)                                   |
| 117.2 | 53.7 | 173.6 | 33.9 | 0.6 | 0.5 | 0.5 | 0.5 | 1 | Q(CS)E(S)R(SC)K(CS)M(S)                                      |
| 129.5 | 62.2 | 174.8 | 34.3 | 0.6 | 0.5 | 0.5 | 0.5 | 1 | V(SC)                                                        |

|       |      |       |      |     |     |     |     |   |                           |
|-------|------|-------|------|-----|-----|-----|-----|---|---------------------------|
| 120.5 | 51.6 | 172.8 | 40.8 | 0.6 | 0.5 | 0.5 | 0.5 | 1 | N(CS)D(C)L(C)F(S)Y(S)     |
| 124.1 | 61.2 | 172.7 | 71.7 | 0.6 | 0.5 | 0.5 | 0.5 | 1 | T(SC)                     |
| 125.3 | 62.1 | 175.2 | 38.3 | 0.6 | 0.5 | 0.5 | 0.5 | 1 | I(CSH)Y(H)                |
| 128.6 | 60.6 | 175.5 | 35.8 | 0.6 | 0.5 | 0.5 | 0.5 | 1 | V(S)I(CS)                 |
| 127.6 | 44.0 | 174.6 |      | 0.6 | 0.5 | 0.5 | 0.5 | 1 | G(CS)                     |
| 115.9 | 54.2 | 176.9 | 35.4 | 0.6 | 0.5 | 0.5 | 0.5 | 1 | K(SC)E(SC)R(S)            |
| 119.4 | 56.4 | 178.9 | 17.0 | 0.6 | 0.5 | 0.5 | 0.5 | 1 | A(H)                      |
| 116.6 | 61.1 | 175.1 | 32.0 | 0.6 | 0.5 | 0.5 | 0.5 | 1 | V(SC)P(C)                 |
| 128.8 | 48.4 | 172.2 |      | 0.6 | 0.5 | 0.5 | 0.5 | 1 | G(CSH)A(S)N(CS)           |
| 114.9 | 43.9 | 172.2 |      | 0.6 | 0.5 | 0.5 | 0.5 | 1 | G(CSH)                    |
| 113.5 | 59.8 | 176.2 | 29.6 | 0.6 | 0.5 | 0.5 | 0.5 | 1 | E(CH)R(H)Q(H)H(H)K(H)C(C) |
| 114.1 | 52.9 | 172.5 | 44.7 | 0.6 | 0.5 | 0.5 | 0.5 | 1 | L(S)D(S)                  |
| 120.8 | 55.2 | 179.1 | 18.3 | 0.6 | 0.5 | 0.5 | 0.5 | 1 | A(H)                      |
| 126.0 | 43.8 | 173.2 |      | 0.6 | 0.5 | 0.5 | 0.5 | 1 | G(CSH)                    |
| 109.9 | 43.7 | 170.9 |      | 0.6 | 0.5 | 0.5 | 0.5 | 1 | G(CS)                     |
| 108.5 | 57.3 | 177.6 | 33.7 | 0.6 | 0.5 | 0.5 | 0.5 | 1 | K(CH)M(H)Q(H)E(H)         |

**Table S6.** Rhodopsin peak lists for the first 98 residues.

## NCACX

| 87    | 5    |       |      |       |     |     |     |     |     |   |                                 |
|-------|------|-------|------|-------|-----|-----|-----|-----|-----|---|---------------------------------|
| 125.0 | 55.4 | 178.9 | 17.1 |       | 0.6 | 0.5 | 0.5 | 0.5 | 0.5 | 1 | A(H)                            |
| 122.3 | 57.8 | 178.0 | 42.0 | 26.2  | 0.6 | 0.5 | 0.5 | 0.5 | 0.5 | 1 | L(HC)K(C)                       |
| 114.5 | 56.6 | 179.3 | 30.3 | 113.8 | 0.6 | 0.5 | 0.5 | 0.5 | 0.5 | 1 | W(HS)                           |
| 113.8 | 58.8 | 180.5 | 30.9 | 32.8  | 0.6 | 0.5 | 0.5 | 0.5 | 0.5 | 1 | K(H)E(H)M(H)                    |
| 116.6 | 60.9 | 174.6 | 63.0 |       | 0.6 | 0.5 | 0.5 | 0.5 | 0.5 | 1 | S(CH)                           |
| 122.8 | 58.5 | 180.2 | 28.2 | 115.5 | 0.6 | 0.5 | 0.5 | 0.5 | 0.5 | 1 | W(H)                            |
| 117.1 | 57.1 | 176.8 | 42.5 | 26.6  | 0.6 | 0.5 | 0.5 | 0.5 | 0.5 | 1 | L(HC)                           |
| 115.3 | 50.8 | 173.4 | 39.2 | 178.5 | 0.6 | 0.5 | 0.5 | 0.5 | 0.5 | 1 | N(CH)D(C)                       |
| 110.8 | 59.3 | 174.5 | 41.9 | 24.6  | 0.6 | 0.5 | 0.5 | 0.5 | 0.5 | 1 | I(SC)L(H)                       |
| 122.6 | 60.5 | 177.9 | 29.0 | 33.4  | 0.6 | 0.5 | 0.5 | 0.5 | 0.5 | 1 | K(HC)E(H)Q(H)R(H)               |
| 109.6 | 63.6 | 178.9 | 34.5 | 22.1  | 0.6 | 0.5 | 0.5 | 0.5 | 0.5 | 1 | V(SCH)                          |
| 121.9 | 67.7 | 179.5 | 32.1 | 22.4  | 0.6 | 0.5 | 0.5 | 0.5 | 0.5 | 1 | V(HCS)                          |
| 116.5 | 61.7 | 178.3 |      |       | 0.6 | 0.5 | 0.5 | 0.5 | 0.5 | 1 | S(H)Y(H)R(H)F(H)                |
| 119.0 | 58.9 | 176.6 | 35.8 | 26.2  | 0.6 | 0.5 | 0.5 | 0.5 | 0.5 | 1 | I(SC)                           |
| 130.7 | 64.7 | 178.4 | 33.8 | 26.8  | 0.6 | 0.5 | 0.5 | 0.5 | 0.5 | 1 | P(C)                            |
| 127.0 | 58.1 | 176.8 | 40.6 | 25.1  | 0.6 | 0.5 | 0.5 | 0.5 | 0.5 | 1 | L(H)                            |
| 117.7 | 61.4 | 179.3 | 29.7 | 38.7  | 0.6 | 0.5 | 0.5 | 0.5 | 0.5 | 1 | E(H)R(H)                        |
| 128.3 | 56.7 | 175.9 | 29.8 | 36.1  | 0.6 | 0.5 | 0.5 | 0.5 | 0.5 | 1 | E(CSH)K(CS)Q(C)R(C)             |
| 132.1 | 65.8 | 178.6 | 32.6 | 27.7  | 0.6 | 0.5 | 0.5 | 0.5 | 0.5 | 1 | P(HCS)                          |
| 117.7 | 58.5 | 178.2 | 41.1 | 26.9  | 0.6 | 0.5 | 0.5 | 0.5 | 0.5 | 1 | L(H)                            |
| 119.8 | 58.1 | 177.9 | 37.1 | 138.0 | 0.6 | 0.5 | 0.5 | 0.5 | 0.5 | 1 | F(HC)Y(H)                       |
| 120.8 | 60.1 | 171.8 | 35.8 | 21.2  | 0.6 | 0.5 | 0.5 | 0.5 | 0.5 | 1 | V(SC)                           |
| 120.2 | 54.3 | 177.3 | 18.7 |       | 0.6 | 0.5 | 0.5 | 0.5 | 0.5 | 1 | A(HC)                           |
| 112.9 | 56.1 | 175.4 |      | 140.9 | 0.6 | 0.5 | 0.5 | 0.5 | 0.5 | 1 | H(C)F(S)                        |
| 139.8 | 62.5 | 177.8 | 32.1 | 27.6  | 0.6 | 0.5 | 0.5 | 0.5 | 0.5 | 1 | P(CSH)                          |
| 117.2 | 67.9 | 176.0 |      |       | 0.6 | 0.5 | 0.5 | 0.5 | 0.5 | 1 | T(HC)V(H)                       |
| 120.9 | 55.4 | 178.8 | 18.1 |       | 0.6 | 0.5 | 0.5 | 0.5 | 0.5 | 1 | A(HC)                           |
| 120.9 | 58.0 | 179.3 | 43.2 | 28.3  | 0.6 | 0.5 | 0.5 | 0.5 | 0.5 | 1 | L(H)                            |
| 121.3 | 60.1 | 177.5 | 37.2 | 126.5 | 0.6 | 0.5 | 0.5 | 0.5 | 0.5 | 1 | Y(H)F(H)                        |
| 115.8 | 64.6 | 178.5 | 63.4 |       | 0.6 | 0.5 | 0.5 | 0.5 | 0.5 | 1 | S(CH)                           |
| 114.2 | 59.4 | 176.3 | 28.6 | 27.9  | 0.6 | 0.5 | 0.5 | 0.5 | 0.5 | 1 | R(HC)                           |
| 129.2 | 52.5 | 176.5 | 21.4 |       | 0.6 | 0.5 | 0.5 | 0.5 | 0.5 | 1 | A(SC)                           |
| 120.2 | 61.0 | 179.7 | 30.5 | 111.7 | 0.6 | 0.5 | 0.5 | 0.5 | 0.5 | 1 | H(H)W(H)Y(H)                    |
| 118.4 | 54.9 | 179.2 | 17.6 |       | 0.6 | 0.5 | 0.5 | 0.5 | 0.5 | 1 | A(HC)                           |
| 118.4 | 68.7 | 176.0 | 32.6 | 25.9  | 0.6 | 0.5 | 0.5 | 0.5 | 0.5 | 1 | K(CH)V(CS)                      |
| 106.5 | 47.6 | 175.2 |      |       | 0.6 | 0.5 | 0.5 | 0.5 | 0.5 | 1 | G(HC)                           |
| 121.4 | 58.9 | 177.9 | 41.3 | 27.1  | 0.6 | 0.5 | 0.5 | 0.5 | 0.5 | 1 | L(HC)                           |
| 126.3 | 59.2 | 177.5 | 33.0 | 31.5  | 0.6 | 0.5 | 0.5 | 0.5 | 0.5 | 1 | K(CH)M(H)V(SC)                  |
| 115.4 | 68.0 | 174.4 | 36.7 | 31.5  | 0.6 | 0.5 | 0.5 | 0.5 | 0.5 | 1 | I(H)                            |
| 117.2 | 62.6 | 178.1 |      | 130.2 | 0.6 | 0.5 | 0.5 | 0.5 | 0.5 | 1 | Y(H)                            |
| 113.9 | 53.8 | 175.0 | 36.4 | 24.4  | 0.6 | 0.5 | 0.5 | 0.5 | 0.5 | 1 | K(C)                            |
| 125.5 | 60.0 | 174.2 | 32.5 | 23.2  | 0.6 | 0.5 | 0.5 | 0.5 | 0.5 | 1 | V(SC)K(CH)                      |
| 117.2 | 63.0 | 176.4 | 62.9 |       | 0.6 | 0.5 | 0.5 | 0.5 | 0.5 | 1 | S(HC)T(C)                       |
| 115.7 | 56.7 | 174.9 | 38.7 | 181.7 | 0.6 | 0.5 | 0.5 | 0.5 | 0.5 | 1 | N(HC)D(CH)E(C)                  |
| 106.6 | 60.3 | 177.8 | 65.4 |       | 0.6 | 0.5 | 0.5 | 0.5 | 0.5 | 1 | S(C)T(C)                        |
| 120.3 | 60.9 | 176.7 | 29.5 | 111.8 | 0.6 | 0.5 | 0.5 | 0.5 | 0.5 | 1 | H(H)W(H)                        |
| 122.2 | 56.4 | 179.9 | 18.0 |       | 0.6 | 0.5 | 0.5 | 0.5 | 0.5 | 1 | A(H)                            |
| 104.2 | 46.0 | 173.3 |      |       | 0.6 | 0.5 | 0.5 | 0.5 | 0.5 | 1 | G(C)                            |
| 129.5 | 55.2 | 176.2 | 25.6 | 128.3 | 0.6 | 0.5 | 0.5 | 0.5 | 0.5 | 1 | H(C)W(C)                        |
| 119.4 | 60.8 | 178.3 | 38.2 | 133.4 | 0.6 | 0.5 | 0.5 | 0.5 | 0.5 | 1 | Y(HC)F(H)                       |
| 114.0 | 57.8 | 178.0 | 41.2 | 26.2  | 0.6 | 0.5 | 0.5 | 0.5 | 0.5 | 1 | L(HC)I(S)                       |
| 121.1 | 57.0 | 178.3 | 33.6 | 35.3  | 0.6 | 0.5 | 0.5 | 0.5 | 0.5 | 1 | K(CH)S)E(HCS)M(HC)V(S)<br>)L(H) |
| 119.9 | 64.4 | 176.2 | 37.1 |       | 0.6 | 0.5 | 0.5 | 0.5 | 0.5 | 1 | I(HC)                           |

|       |      |       |      |       |     |     |     |     |     |   |                                    |
|-------|------|-------|------|-------|-----|-----|-----|-----|-----|---|------------------------------------|
| 110.6 | 59.2 | 176.9 | 34.3 | 35.3  | 0.6 | 0.5 | 0.5 | 0.5 | 0.5 | 1 | V(SC)Q(H)E(HC)K(CHS)<br>M(H)       |
| 124.2 | 56.1 | 179.3 | 18.3 |       | 0.6 | 0.5 | 0.5 | 0.5 | 0.5 | 1 | A(H)                               |
| 134.4 | 50.6 | 177.4 | 17.4 |       | 0.6 | 0.5 | 0.5 | 0.5 | 0.5 | 1 | A(C)                               |
| 120.2 | 57.0 | 179.1 | 42.1 | 26.3  | 0.6 | 0.5 | 0.5 | 0.5 | 0.5 | 1 | L(HC)                              |
| 107.5 | 66.0 | 177.8 | 70.2 |       | 0.6 | 0.5 | 0.5 | 0.5 | 0.5 | 1 | T(HS)                              |
| 127.0 | 55.7 | 179.7 | 15.3 |       | 0.6 | 0.5 | 0.5 | 0.5 | 0.5 | 1 | A(H)                               |
| 115.8 | 58.1 | 179.4 | 42.6 | 26.8  | 0.6 | 0.5 | 0.5 | 0.5 | 0.5 | 1 | L(H)                               |
| 106.5 | 47.8 | 175.8 |      |       | 0.6 | 0.5 | 0.5 | 0.5 | 0.5 | 1 | G(HC)                              |
| 118.7 | 55.0 | 177.7 | 18.9 |       | 0.6 | 0.5 | 0.5 | 0.5 | 0.5 | 1 | A(HC)                              |
| 125.6 | 58.2 | 172.7 | 31.1 | 32.1  | 0.6 | 0.5 | 0.5 | 0.5 | 0.5 | 1 | R(C)K(H)E(C)M(H)                   |
| 119.9 | 65.8 | 177.7 | 37.2 | 29.8  | 0.6 | 0.5 | 0.5 | 0.5 | 0.5 | 1 | I(HC)                              |
| 115.7 | 63.4 | 177.7 | 28.8 | 129.2 | 0.6 | 0.5 | 0.5 | 0.5 | 0.5 | 1 | W(H)H(H)Y(H)                       |
| 119.9 | 56.5 | 176.8 | 32.8 |       | 0.6 | 0.5 | 0.5 | 0.5 | 0.5 | 1 | K(CHS)M(CH)Q(CSH)R(<br>C)V(CS)W(S) |
| 115.9 | 63.4 | 175.7 |      | 132.0 | 0.6 | 0.5 | 0.5 | 0.5 | 0.5 | 1 | Y(CS)                              |
| 120.2 | 63.0 | 177.2 | 40.2 | 139.5 | 0.6 | 0.5 | 0.5 | 0.5 | 0.5 | 1 | F(HC)                              |
| 118.3 | 57.7 | 179.6 | 41.6 | 27.7  | 0.6 | 0.5 | 0.5 | 0.5 | 0.5 | 1 | L(H)                               |
| 120.3 | 59.4 | 177.7 | 27.9 | 127.9 | 0.6 | 0.5 | 0.5 | 0.5 | 0.5 | 1 | H(H)Q(H)W(H)                       |
| 112.8 | 67.1 | 176.4 | 68.0 |       | 0.6 | 0.5 | 0.5 | 0.5 | 0.5 | 1 | T(HC)                              |
| 102.8 | 45.7 | 173.7 |      |       | 0.6 | 0.5 | 0.5 | 0.5 | 0.5 | 1 | G(CH)                              |
| 112.8 | 59.9 | 177.5 | 37.8 | 128.6 | 0.6 | 0.5 | 0.5 | 0.5 | 0.5 | 1 | Y(HC)F(H)                          |
| 118.2 | 53.2 | 172.5 | 29.6 | 29.9  | 0.6 | 0.5 | 0.5 | 0.5 | 0.5 | 1 | Q(CH)K(H)                          |
| 137.8 | 66.6 | 178.8 | 31.9 | 29.0  | 0.6 | 0.5 | 0.5 | 0.5 | 0.5 | 1 | P(HC)                              |
| 127.0 | 53.1 | 178.0 | 18.1 |       | 0.6 | 0.5 | 0.5 | 0.5 | 0.5 | 1 | A(CH)                              |
| 121.3 | 63.7 | 177.5 | 38.6 | 129.0 | 0.6 | 0.5 | 0.5 | 0.5 | 0.5 | 1 | F(H)Y(H)                           |
| 119.0 | 69.4 | 175.2 | 66.8 |       | 0.6 | 0.5 | 0.5 | 0.5 | 0.5 | 1 | T(CHS)                             |
| 117.5 | 54.8 | 175.4 | 31.6 | 35.4  | 0.6 | 0.5 | 0.5 | 0.5 | 0.5 | 1 | E(SC)R(CS)Q(CS)                    |
| 109.0 | 53.2 | 176.6 | 33.0 | 34.2  | 0.6 | 0.5 | 0.5 | 0.5 | 0.5 | 1 | M(C)                               |
| 111.5 | 60.2 | 174.1 | 35.8 | 23.8  | 0.6 | 0.5 | 0.5 | 0.5 | 0.5 | 1 | I(SC)                              |
| 120.4 | 66.3 | 177.5 | 37.7 | 28.9  | 0.6 | 0.5 | 0.5 | 0.5 | 0.5 | 1 | I(H)                               |
| 119.3 | 65.5 | 178.0 | 38.4 | 29.7  | 0.6 | 0.5 | 0.5 | 0.5 | 0.5 | 1 | I(H)                               |
| 101.9 | 46.2 | 172.1 |      |       | 0.6 | 0.5 | 0.5 | 0.5 | 0.5 | 1 | G(CSH)                             |
| 105.5 | 47.8 | 172.7 |      |       | 0.6 | 0.5 | 0.5 | 0.5 | 0.5 | 1 | G(CHS)                             |
| 121.9 | 58.5 | 178.5 | 41.2 | 27.5  | 0.6 | 0.5 | 0.5 | 0.5 | 0.5 | 1 | L(HC)                              |
| 116.4 | 56.1 | 178.3 | 40.7 | 178.3 | 0.6 | 0.5 | 0.5 | 0.5 | 0.5 | 1 | D(HC)N(H)                          |

## NCOCX

| 82    | 5    |       |      |       |     |     |     |     |     |   |                                             |
|-------|------|-------|------|-------|-----|-----|-----|-----|-----|---|---------------------------------------------|
| 124.2 | 67.9 | 180.1 | 32.0 | 22.5  | 0.6 | 0.5 | 0.5 | 0.5 | 0.5 | 1 | V(H)                                        |
| 119.9 | 57.9 | 179.3 | 42.4 | 27.1  | 0.6 | 0.5 | 0.5 | 0.5 | 0.5 | 1 | L(HC)I(S)                                   |
| 117.7 | 62.6 | 178.4 |      | 130.1 | 0.6 | 0.5 | 0.5 | 0.5 | 0.5 | 1 | Y(H)F(H)H(HC)                               |
| 120.0 | 64.6 | 175.9 | 37.3 |       | 0.6 | 0.5 | 0.5 | 0.5 | 0.5 | 1 | I(HC)                                       |
| 115.9 | 66.0 | 177.1 | 37.7 | 29.1  | 0.6 | 0.5 | 0.5 | 0.5 | 0.5 | 1 | I(HCS)                                      |
| 125.4 | 59.7 | 177.6 | 37.0 | 126.5 | 0.6 | 0.5 | 0.5 | 0.5 | 0.5 | 1 | Y(H)F(H)                                    |
| 117.9 | 46.0 | 173.0 |      |       | 0.6 | 0.5 | 0.5 | 0.5 | 0.5 | 1 | G(CSH)                                      |
| 114.6 | 56.3 | 178.3 | 40.6 | 178.7 | 0.6 | 0.5 | 0.5 | 0.5 | 0.5 | 1 | D(HC)N(HC)                                  |
| 119.7 | 59.8 | 177.3 | 37.7 | 128.5 | 0.6 | 0.5 | 0.5 | 0.5 | 0.5 | 1 | F(H)Y(HC)                                   |
| 119.7 | 62.1 | 178.2 |      |       | 0.6 | 0.5 | 0.5 | 0.5 | 0.5 | 1 | Y(H)P(CS)F(HC)S(H)I(HC)<br>W(H)T(C)R(H)E(H) |
| 113.9 | 67.0 | 179.1 | 32.1 | 29.0  | 0.6 | 0.5 | 0.5 | 0.5 | 0.5 | 1 | P(HC)E(H)                                   |
| 119.5 | 65.3 | 178.7 | 32.3 | 28.0  | 0.6 | 0.5 | 0.5 | 0.5 | 0.5 | 1 | P(CHS)                                      |
| 118.8 | 58.6 | 179.8 | 28.3 | 115.3 | 0.6 | 0.5 | 0.5 | 0.5 | 0.5 | 1 | W(H)                                        |
| 104.2 | 52.8 | 177.7 | 17.8 |       | 0.6 | 0.5 | 0.5 | 0.5 | 0.5 | 1 | A(CHS)                                      |
| 119.5 | 59.6 | 174.8 | 41.9 | 24.5  | 0.6 | 0.5 | 0.5 | 0.5 | 0.5 | 1 | I(SC)                                       |
| 113.1 | 65.8 | 177.4 | 70.4 |       | 0.6 | 0.5 | 0.5 | 0.5 | 0.5 | 1 | T(H)                                        |
| 125.5 | 45.5 | 174.0 |      |       | 0.6 | 0.5 | 0.5 | 0.5 | 0.5 | 1 | G(CHS)                                      |
| 127.4 | 58.9 | 180.6 | 31.2 | 33.3  | 0.6 | 0.5 | 0.5 | 0.5 | 0.5 | 1 | Q(HC)M(H)E(H)K(C)                           |

|       |      |       |      |       |     |     |     |     |     |   |                             |
|-------|------|-------|------|-------|-----|-----|-----|-----|-----|---|-----------------------------|
| 113.0 | 59.5 | 176.0 | 28.7 | 27.5  | 0.6 | 0.5 | 0.5 | 0.5 | 0.5 | 1 | R(HC)                       |
| 109.2 | 54.0 | 177.4 | 19.0 |       | 0.6 | 0.5 | 0.5 | 0.5 | 0.5 | 1 | A(CH)                       |
| 121.4 | 58.3 | 178.4 | 41.5 | 27.2  | 0.6 | 0.5 | 0.5 | 0.5 | 0.5 | 1 | L(HC)                       |
| 120.4 | 63.6 | 177.7 | 29.0 | 129.0 | 0.6 | 0.5 | 0.5 | 0.5 | 0.5 | 1 | H(H)                        |
| 121.5 | 63.4 | 175.5 |      | 132.1 | 0.6 | 0.5 | 0.5 | 0.5 | 0.5 | 1 | Y(CS)                       |
| 120.5 | 68.9 | 175.3 | 66.4 |       | 0.6 | 0.5 | 0.5 | 0.5 | 0.5 | 1 | T(HCS)                      |
| 125.4 | 56.7 | 179.8 | 30.0 | 113.4 | 0.6 | 0.5 | 0.5 | 0.5 | 0.5 | 1 | W(H)                        |
| 120.2 | 59.3 | 176.4 | 34.2 | 35.2  | 0.6 | 0.5 | 0.5 | 0.5 | 0.5 | 1 | Q(H)V(S)K(CS)E(C)M(HC)R(C)  |
| 119.9 | 59.2 | 178.0 | 27.8 | 128.2 | 0.6 | 0.5 | 0.5 | 0.5 | 0.5 | 1 | H(H)                        |
| 121.1 | 66.2 | 177.6 | 37.4 | 30.1  | 0.6 | 0.5 | 0.5 | 0.5 | 0.5 | 1 | I(H)                        |
| 110.8 | 55.2 | 179.4 | 15.8 |       | 0.6 | 0.5 | 0.5 | 0.5 | 0.5 | 1 | A(H)                        |
| 122.7 | 47.8 | 172.7 |      |       | 0.6 | 0.5 | 0.5 | 0.5 | 0.5 | 1 | G(CS)A(CS)D(C)              |
| 107.5 | 63.3 | 178.7 | 34.4 | 22.0  | 0.6 | 0.5 | 0.5 | 0.5 | 0.5 | 1 | V(SC)                       |
| 106.1 | 60.0 | 178.0 | 65.5 |       | 0.6 | 0.5 | 0.5 | 0.5 | 0.5 | 1 | T(CS)S(HC)                  |
| 140.4 | 59.8 | 173.9 | 32.2 | 23.2  | 0.6 | 0.5 | 0.5 | 0.5 | 0.5 | 1 | V(SC)                       |
| 121.6 | 48.2 | 175.7 |      |       | 0.6 | 0.5 | 0.5 | 0.5 | 0.5 | 1 | G(HC)                       |
| 122.5 | 53.5 | 176.7 | 33.1 | 33.9  | 0.6 | 0.5 | 0.5 | 0.5 | 0.5 | 1 | K(CSH)E(SC)M(CSH)R(SC)Q(SC) |
| 113.0 | 60.5 | 177.6 | 28.7 | 33.1  | 0.6 | 0.5 | 0.5 | 0.5 | 0.5 | 1 | K(HC)E(H)Q(H)               |
| 128.9 | 56.6 | 175.9 | 29.9 | 36.0  | 0.6 | 0.5 | 0.5 | 0.5 | 0.5 | 1 | E(CH)Q(C)                   |
| 117.2 | 57.3 | 176.8 | 42.5 | 26.2  | 0.6 | 0.5 | 0.5 | 0.5 | 0.5 | 1 | L(HC)                       |
| 115.4 | 63.2 | 177.3 | 40.4 | 139.2 | 0.6 | 0.5 | 0.5 | 0.5 | 0.5 | 1 | F(H)                        |
| 109.6 | 58.2 | 172.6 | 31.6 | 31.9  | 0.6 | 0.5 | 0.5 | 0.5 | 0.5 | 1 | K(CH)M(HC)R(C)Q(C)          |
| 118.4 | 59.3 | 178.3 | 41.9 | 27.1  | 0.6 | 0.5 | 0.5 | 0.5 | 0.5 | 1 | L(HC)                       |
| 116.0 | 58.0 | 177.0 | 40.5 | 25.1  | 0.6 | 0.5 | 0.5 | 0.5 | 0.5 | 1 | L(HC)                       |
| 130.6 | 51.1 | 173.1 | 39.2 | 178.2 | 0.6 | 0.5 | 0.5 | 0.5 | 0.5 | 1 | N(C)D(C)                    |
| 121.7 | 63.4 | 177.1 | 38.6 | 128.7 | 0.6 | 0.5 | 0.5 | 0.5 | 0.5 | 1 | Y(H)F(H)                    |
| 122.1 | 64.2 | 178.4 | 63.6 |       | 0.6 | 0.5 | 0.5 | 0.5 | 0.5 | 1 | S(H)                        |
| 127.1 | 58.0 | 179.5 | 41.8 | 27.8  | 0.6 | 0.5 | 0.5 | 0.5 | 0.5 | 1 | L(HC)                       |
| 113.7 | 54.9 | 179.3 | 17.6 |       | 0.6 | 0.5 | 0.5 | 0.5 | 0.5 | 1 | A(HC)                       |
| 118.8 | 68.8 | 176.0 | 32.7 | 25.9  | 0.6 | 0.5 | 0.5 | 0.5 | 0.5 | 1 | V(H)                        |
| 127.1 | 52.1 | 176.5 | 21.7 |       | 0.6 | 0.5 | 0.5 | 0.5 | 0.5 | 1 | A(CS)                       |
| 118.3 | 59.2 | 177.5 | 32.8 | 31.4  | 0.6 | 0.5 | 0.5 | 0.5 | 0.5 | 1 | K(HC)M(H)                   |
| 122.8 | 62.9 | 176.6 | 62.7 |       | 0.6 | 0.5 | 0.5 | 0.5 | 0.5 | 1 | S(H)                        |
| 119.6 | 53.1 | 172.3 | 30.0 | 29.9  | 0.6 | 0.5 | 0.5 | 0.5 | 0.5 | 1 | E(CH)Q(S)                   |
| 106.7 | 55.6 | 179.4 | 18.1 |       | 0.6 | 0.5 | 0.5 | 0.5 | 0.5 | 1 | A(HC)                       |
| 111.4 | 56.0 | 175.2 |      | 140.7 | 0.6 | 0.5 | 0.5 | 0.5 | 0.5 | 1 | F(SC)                       |
| 119.6 | 55.4 | 178.6 | 17.8 |       | 0.6 | 0.5 | 0.5 | 0.5 | 0.5 | 1 | A(HC)                       |
| 101.9 | 54.6 | 175.0 | 31.6 | 35.5  | 0.6 | 0.5 | 0.5 | 0.5 | 0.5 | 1 | Q(SC)                       |
| 105.2 | 65.5 | 178.1 | 38.2 | 29.5  | 0.6 | 0.5 | 0.5 | 0.5 | 0.5 | 1 | I(H)                        |
| 126.6 | 60.9 | 178.5 | 38.4 | 133.7 | 0.6 | 0.5 | 0.5 | 0.5 | 0.5 | 1 | Y(HC)F(H)                   |
| 121.2 | 55.3 | 176.2 | 25.5 | 128.2 | 0.6 | 0.5 | 0.5 | 0.5 | 0.5 | 1 | H(C)                        |
| 115.5 | 61.3 | 179.1 | 30.1 | 38.6  | 0.6 | 0.5 | 0.5 | 0.5 | 0.5 | 1 | E(H)                        |
| 137.8 | 66.6 | 176.2 | 67.9 |       | 0.6 | 0.5 | 0.5 | 0.5 | 0.5 | 1 | T(HC)                       |
| 114.0 | 46.0 | 172.4 |      |       | 0.6 | 0.5 | 0.5 | 0.5 | 0.5 | 1 | G(CS)                       |
| 116.7 | 56.9 | 178.0 | 33.8 | 35.1  | 0.6 | 0.5 | 0.5 | 0.5 | 0.5 | 1 | K(CH)E(CH)M(HC)Q(H)         |
| 134.4 | 58.8 | 176.5 | 36.2 | 26.4  | 0.6 | 0.5 | 0.5 | 0.5 | 0.5 | 1 | I(SC)                       |
| 120.9 | 53.7 | 175.4 | 36.7 | 23.9  | 0.6 | 0.5 | 0.5 | 0.5 | 0.5 | 1 | K(SC)L(C)                   |
| 106.4 | 61.2 | 176.8 | 29.4 | 111.7 | 0.6 | 0.5 | 0.5 | 0.5 | 0.5 | 1 | W(CH)                       |
| 116.2 | 57.1 | 178.8 | 42.1 | 25.8  | 0.6 | 0.5 | 0.5 | 0.5 | 0.5 | 1 | L(HC)                       |
| 115.5 | 60.2 | 174.1 | 36.0 | 23.3  | 0.6 | 0.5 | 0.5 | 0.5 | 0.5 | 1 | I(SC)                       |
| 121.1 | 57.9 | 177.5 | 41.1 | 26.0  | 0.6 | 0.5 | 0.5 | 0.5 | 0.5 | 1 | L(HC)                       |
| 113.8 | 55.3 | 179.0 | 17.1 |       | 0.6 | 0.5 | 0.5 | 0.5 | 0.5 | 1 | A(H)                        |
| 111.1 | 55.5 | 177.9 | 18.7 |       | 0.6 | 0.5 | 0.5 | 0.5 | 0.5 | 1 | A(HC)                       |
| 129.5 | 51.1 | 177.2 | 17.6 |       | 0.6 | 0.5 | 0.5 | 0.5 | 0.5 | 1 | A(CHS)                      |
| 117.2 | 57.9 | 178.4 | 41.7 | 26.0  | 0.6 | 0.5 | 0.5 | 0.5 | 0.5 | 1 | L(HC)                       |
| 118.3 | 57.8 | 179.6 | 43.1 | 28.2  | 0.6 | 0.5 | 0.5 | 0.5 | 0.5 | 1 | L(H)                        |
| 119.8 | 61.1 | 179.7 | 30.6 | 112.0 | 0.6 | 0.5 | 0.5 | 0.5 | 0.5 | 1 | W(C)                        |
| 115.7 | 56.3 | 179.7 | 17.9 |       | 0.6 | 0.5 | 0.5 | 0.5 | 0.5 | 1 | A(HC)                       |
| 115.6 | 58.4 | 178.1 | 40.8 | 26.9  | 0.6 | 0.5 | 0.5 | 0.5 | 0.5 | 1 | L(HC)                       |
| 132.4 | 67.8 | 174.8 | 36.7 | 31.4  | 0.6 | 0.5 | 0.5 | 0.5 | 0.5 | 1 | I(H)                        |

---

|       |      |       |      |       |     |     |     |     |     |   |           |
|-------|------|-------|------|-------|-----|-----|-----|-----|-----|---|-----------|
| 119.8 | 68.2 | 176.3 |      |       | 0.6 | 0.5 | 0.5 | 0.5 | 0.5 | 1 | T(H)V(H)  |
| 127.9 | 60.1 | 171.6 | 35.8 | 21.2  | 0.6 | 0.5 | 0.5 | 0.5 | 0.5 | 1 | V(SC)     |
| 117.5 | 56.4 | 174.8 | 38.9 | 181.7 | 0.6 | 0.5 | 0.5 | 0.5 | 0.5 | 1 | D(C)N(HC) |
| 121.2 | 47.5 | 174.9 |      |       | 0.6 | 0.5 | 0.5 | 0.5 | 0.5 | 1 | G(CHS)    |

---

**Table S7.** HNP-1 peak lists.

| NCACX |       |      |      |       |      |      |      |  |     |     |     |     |     |     |     |     |   |                                  |
|-------|-------|------|------|-------|------|------|------|--|-----|-----|-----|-----|-----|-----|-----|-----|---|----------------------------------|
| 27    | 8     |      |      |       |      |      |      |  |     |     |     |     |     |     |     |     |   |                                  |
| 109.3 | 172.8 | 42.5 |      |       |      |      |      |  | 1.0 | 0.5 | 0.4 | 0.4 | 0.3 | 0.3 | 0.3 | 0.3 | 1 | G(CS)                            |
| 103.7 | 170.7 | 44.0 |      |       |      |      |      |  | 1.0 | 0.5 | 0.4 | 0.4 | 0.3 | 0.3 | 0.3 | 0.3 | 1 | G(CSH)                           |
| 107.0 | 171.9 | 45.0 |      |       |      |      |      |  | 1.0 | 0.5 | 0.4 | 0.4 | 0.3 | 0.3 | 0.3 | 0.3 | 1 | G(CH)                            |
| 123.0 | 172.4 | 48.7 | 20.5 |       |      |      |      |  | 1.0 | 0.5 | 0.4 | 0.4 | 0.3 | 0.3 | 0.3 | 0.3 | 1 | A(SC)                            |
| 107.0 |       | 49.3 | 17.5 |       |      |      |      |  | 1.0 | 0.5 | 0.4 | 0.4 | 0.3 | 0.3 | 0.3 | 0.3 | 1 | A(H)                             |
| 115.8 | 173.1 | 50.7 | 33.4 |       |      |      |      |  | 1.0 | 0.5 | 0.4 | 0.4 | 0.3 | 0.3 | 0.3 | 0.3 | 1 | R(SC)E(SC)Y(C)F(C)C(C)           |
| 115.9 |       | 50.7 | 32.7 |       |      |      |      |  | 1.0 | 0.5 | 0.4 | 0.4 | 0.3 | 0.3 | 0.3 | 0.3 | 1 | E(SC)R(S)Y(C)                    |
| 116.4 | 172.4 | 50.9 |      |       |      |      |      |  | 1.0 | 0.5 | 0.4 | 0.4 | 0.3 | 0.3 | 0.3 | 0.3 | 1 | L(SC)E(S)R(CS)Q(S)C(CH)          |
| 126.6 | 173.0 | 51.0 | 17.0 |       |      |      |      |  | 1.0 | 0.5 | 0.4 | 0.4 | 0.3 | 0.3 | 0.3 | 0.3 | 1 | A(CSH)                           |
| 118.2 | 172.3 | 51.5 |      | 25.4  |      |      |      |  | 1.0 | 0.5 | 0.4 | 0.4 | 0.3 | 0.3 | 0.3 | 0.3 | 1 | L(SC)Q(CS)R(CS)E(S)              |
| 122.5 | 171.7 | 51.5 | 43.0 |       |      |      |      |  | 1.0 | 0.5 | 0.4 | 0.4 | 0.3 | 0.3 | 0.3 | 0.3 | 1 | C(SC)L(SC)F(S)                   |
| 120.4 |       | 51.9 | 16.8 |       |      |      |      |  | 1.1 | 0.5 | 0.4 | 0.4 | 0.3 | 0.3 | 0.3 | 0.3 | 1 | A(HC)                            |
| 119.9 | 174.3 | 51.9 |      | 25.4  |      | 23.2 | 22.3 |  | 1.0 | 0.5 | 0.4 | 0.4 | 0.3 | 0.3 | 0.3 | 0.3 | 1 | L(CSH)                           |
| 120.5 |       | 52.1 | 29.0 |       |      |      |      |  | 1.0 | 0.5 | 0.4 | 0.4 | 0.3 | 0.3 | 0.3 | 0.3 | 1 | R(CSH)E(CSH)Q(SC)L(CSH)W(C)      |
| 120.5 | 172.8 | 52.6 | 39.2 |       |      |      |      |  | 1.0 | 0.5 | 0.4 | 0.4 | 0.3 | 0.3 | 0.3 | 0.3 | 1 | C(C)L(CHS)Q(C)F(SC)Y(S)          |
| 130.5 | 171.5 | 52.7 | 43.5 |       |      |      |      |  | 1.0 | 0.5 | 0.4 | 0.4 | 0.3 | 0.3 | 0.3 | 0.3 | 1 | C(S)L(S)                         |
| 130.4 | 172.6 | 52.9 | 44.6 |       |      |      |      |  | 1.0 | 0.5 | 0.4 | 0.4 | 0.3 | 0.3 | 0.3 | 0.3 | 1 | C(S)L(S)                         |
| 117.2 | 171.4 | 53.0 | 46.6 |       |      |      |      |  | 1.0 | 0.5 | 0.4 | 0.4 | 0.3 | 0.3 | 0.3 | 0.3 | 1 | L(CS)C(SC)                       |
| 121.9 | 173.0 | 53.8 | 33.8 | 26.6  |      | 41.4 |      |  | 1.5 | 0.5 | 0.4 | 0.4 | 0.3 | 0.3 | 0.3 | 0.3 | 1 | R(C)                             |
| 117.3 | 172.5 | 54.8 |      |       |      |      |      |  | 1.0 | 0.5 | 0.4 | 0.4 | 0.3 | 0.3 | 0.3 | 0.3 | 1 | Y(SC)F(SC)E(CSH)R(CHS)Q(CH)L(CH) |
|       |       |      |      |       |      |      |      |  |     |     |     |     |     |     |     |     |   | )                                |
| 124.5 | 172.6 | 54.8 | 37.8 |       |      |      |      |  | 1.0 | 0.5 | 0.4 | 0.4 | 0.3 | 0.3 | 0.3 | 0.3 | 1 | F(SC)Y(SC)I(SC)L(CHS)E(CS)C(S)   |
| 127.4 | 173.6 | 56.2 | 39.1 | 131.0 |      |      |      |  | 1.0 | 0.5 | 0.4 | 0.4 | 0.3 | 0.3 | 0.3 | 0.3 | 1 | F(S)Y(S)                         |
| 122.5 | 172.6 | 56.3 | 41.2 |       | 15.3 |      |      |  | 1.0 | 0.5 | 0.4 | 0.4 | 0.3 | 0.3 | 0.3 | 0.3 | 1 | I(S)                             |
| 115.8 | 173.0 | 57.9 | 37.3 |       | 15.9 |      |      |  | 1.0 | 0.5 | 0.4 | 0.4 | 0.3 | 0.3 | 0.3 | 0.3 | 1 | I(SC)                            |
| 123.6 | 171.6 | 59.5 |      |       |      |      |      |  | 1.0 | 0.5 | 0.4 | 0.4 | 0.3 | 0.3 | 0.3 | 0.3 | 1 | T(SC)I(SC)                       |
| 124.0 | 173.5 | 59.8 | 35.8 | 24.4  | 16.3 | 11.5 |      |  | 1.0 | 0.5 | 0.4 | 0.4 | 0.3 | 0.3 | 0.3 | 0.3 | 1 | I(CSH)                           |
| 123.0 |       | 54.5 | 28.0 |       |      |      |      |  | 1.0 | 0.5 | 0.4 | 0.4 | 0.3 | 0.3 | 0.3 | 0.3 | 1 | E(CH)R(C)                        |

| NCOCX |       |      |      |  |  |  |  |  |     |     |     |     |     |     |     |     |   |                 |
|-------|-------|------|------|--|--|--|--|--|-----|-----|-----|-----|-----|-----|-----|-----|---|-----------------|
| 25    | 8     |      |      |  |  |  |  |  |     |     |     |     |     |     |     |     |   |                 |
| 120.5 | 172.8 | 42.3 |      |  |  |  |  |  | 1.0 | 0.5 | 0.4 | 0.4 | 0.3 | 0.3 | 0.3 | 0.3 | 1 | G(CSH)          |
| 118.3 | 171.1 | 44.1 |      |  |  |  |  |  | 1.0 | 0.5 | 0.4 | 0.4 | 0.3 | 0.3 | 0.3 | 0.3 | 1 | G(CS)           |
| 123.8 | 172.0 | 45.0 |      |  |  |  |  |  | 1.0 | 0.5 | 0.4 | 0.4 | 0.3 | 0.3 | 0.3 | 0.3 | 1 | G(CH)L(S)       |
| 115.6 | 173.1 | 48.8 | 20.6 |  |  |  |  |  | 1.0 | 0.5 | 0.4 | 0.4 | 0.3 | 0.3 | 0.3 | 0.3 | 1 | A(SC)           |
| 117.3 | 170.9 | 49.4 | 17.8 |  |  |  |  |  | 1.0 | 0.5 | 0.4 | 0.4 | 0.3 | 0.3 | 0.3 | 0.3 | 1 | A(CS)           |
| 123.9 | 173.9 | 50.8 |      |  |  |  |  |  | 1.0 | 0.5 | 0.4 | 0.4 | 0.3 | 0.3 | 0.3 | 0.3 | 1 | L(SC)A(CSH)E(S) |



|       |       |      |      |       |      |      |  |     |     |     |     |     |     |     |     |   |                                          |
|-------|-------|------|------|-------|------|------|--|-----|-----|-----|-----|-----|-----|-----|-----|---|------------------------------------------|
| 115.5 | 173.1 | 50.8 | 33.1 |       |      |      |  | 1.0 | 0.5 | 0.4 | 0.4 | 0.3 | 0.3 | 0.3 | 0.3 | 1 | E(S)R(S)Y(C)L(H)W(S)C(C)Q(SC)            |
| 122.1 | 172.1 | 51.0 |      |       |      |      |  | 1.0 | 0.5 | 0.4 | 0.4 | 0.3 | 0.3 | 0.3 | 0.3 | 1 | L(SC)R(SC)E(SC)Q(S)F(S)W(S)A(C)          |
| 124.2 | 173.2 | 51.2 | 17.0 |       |      |      |  | 1.0 | 0.5 | 0.4 | 0.4 | 0.3 | 0.3 | 0.3 | 0.3 | 1 | A(CHS)                                   |
| 120.3 | 172.4 | 51.6 |      |       |      |      |  | 1.0 | 0.5 | 0.4 | 0.4 | 0.3 | 0.3 | 0.3 | 0.3 | 1 | L(SCH)Q(SC)E(SC)R(SC)C(CS)F(S)A(C)W(S)   |
| 123.5 | 171.8 | 51.6 | 43.1 |       |      |      |  | 1.0 | 0.5 | 0.4 | 0.4 | 0.3 | 0.3 | 0.3 | 0.3 | 1 | L(SC)F(S)C(S)                            |
| 118.9 | 175.2 | 51.9 |      | 23.4  |      |      |  | 1.0 | 0.5 | 0.4 | 0.4 | 0.3 | 0.3 | 0.3 | 0.3 | 1 | L(CS)R(CS)Q(C)A(S)                       |
| 120.8 | 173.9 | 52.0 | 42.1 |       |      |      |  | 1.0 | 0.5 | 0.4 | 0.4 | 0.3 | 0.3 | 0.3 | 0.3 | 1 | L(SCH)                                   |
| 125.0 | 174.0 | 52.0 | 16.8 |       |      |      |  | 1.0 | 0.5 | 0.4 | 0.4 | 0.3 | 0.3 | 0.3 | 0.3 | 1 | A(CH)                                    |
| 127.0 | 174.8 | 52.1 | 29.3 |       |      |      |  | 1.0 | 0.5 | 0.4 | 0.4 | 0.3 | 0.3 | 0.3 | 0.3 | 1 | R(CSH)E(CS)Q(CS)W(S)C(C)                 |
| 124.0 | 171.5 | 52.5 |      |       |      |      |  | 1.5 | 0.5 | 0.4 | 0.4 | 0.3 | 0.3 | 0.3 | 0.3 | 1 | E(SC)R(SC)Q(SC)L(SC)C(SC)Y(SC)F(SC)W(CS) |
| 121.2 | 173.0 | 52.8 | 39.0 |       |      |      |  | 1.0 | 0.5 | 0.4 | 0.4 | 0.3 | 0.3 | 0.3 | 0.3 | 1 | L(CSH)F(SC)Y(SC)E(SC)C(C)                |
| 117.6 | 171.6 | 52.9 | 46.9 |       |      |      |  | 1.0 | 0.5 | 0.4 | 0.4 | 0.3 | 0.3 | 0.3 | 0.3 | 1 | L(SH)C(S)                                |
| 122.5 | 173.1 | 54.2 | 33.8 | 26.6  |      | 41.4 |  | 1.0 | 0.5 | 0.4 | 0.4 | 0.3 | 0.3 | 0.3 | 0.3 | 1 | R(C)                                     |
| 126.7 | 173.1 | 54.6 |      |       |      |      |  | 1.0 | 0.5 | 0.4 | 0.4 | 0.3 | 0.3 | 0.3 | 0.3 | 1 | Q(C)F(SC)Y(SC)R(CS)E(SH)L(C)W(S)C)       |
| 130.5 | 172.6 | 54.6 | 37.6 |       |      |      |  | 1.0 | 0.5 | 0.4 | 0.4 | 0.3 | 0.3 | 0.3 | 0.3 | 1 | Y(SC)F(SC)I(S)L(C)                       |
| 106.8 | 173.9 | 56.7 | 38.7 | 130.9 |      |      |  | 1.0 | 0.5 | 0.4 | 0.4 | 0.3 | 0.3 | 0.3 | 0.3 | 1 | Y(SC)F(CSH)                              |
| 122.7 | 171.7 | 59.7 |      |       |      |      |  | 1.0 | 0.5 | 0.4 | 0.4 | 0.3 | 0.3 | 0.3 | 0.3 | 1 | T(CS)I(SC)P(C)                           |
| 125.5 | 173.7 |      |      | 24.6  | 16.6 | 11.4 |  | 1.0 | 0.5 | 0.4 | 0.4 | 0.3 | 0.3 | 0.3 | 0.3 | 1 | I(SC)                                    |
| 127.7 | 175   | 54.2 | 28.0 |       |      |      |  | 1.0 | 0.8 | 0.4 | 0.4 | 0.3 | 0.3 | 0.3 | 0.3 | 1 | E(CH)R(C)                                |

**Table S8.** Amino acid sequences of the four proteins investigated here.

|                                        |                                                                                                     |
|----------------------------------------|-----------------------------------------------------------------------------------------------------|
| <b>GB1</b>                             | MQYKLILNGKTLKGETTTEAVDAATAEKVFKQYANDNGVDGEWTYDDATKTFTVT<br>E                                        |
| <b>HET-s</b>                           | MKIDAIVGRNSAKDIRTEERARVQLGNVVTAALHGGIRISDQTTNSVETVVGKGESR<br>VLIGNEYGGKGFWDNHHHHHH                  |
| <b>Truncated Sensory<br/>Rhodopsin</b> | MNLESLHWHYVAGMTIGALHFWLSRNPGRVGPQYEYLVAMFIPIWSGLAYMAMAI<br>DQKVEAAGQIAHYARYIDWMVTTPLLLSLSWTAMQFIKKD |
| <b>HNP-1</b>                           | ACYCRIPACIAGERRYGTCTIYQGRWAFCC                                                                      |
